1 ENCODING OF LIMB STATE BY SINGLE NEURONS IN THE CUNEATE NUCLEUS OF AWAKE MONKEYS

2 Christopher Versteeg, Joshua M. Rosenow, Sliman J. Bensmaia & Lee E. Miller

3 Keywords: Proprioception, Sensory Gain Modulation, Cuneate Nucleus, Monkey, Reaching,  
4 Single neurons

5

## 6 Abstract

7 The cuneate nucleus (CN) is among the first sites along the neuraxis where proprioceptive signals  
8 can be integrated, transformed, and modulated. The objective of the study was to characterize  
9 the proprioceptive representations in CN. To this end, we recorded from single CN neurons in  
10 three monkeys during active reaching and passive limb perturbation. We found that many neurons  
11 exhibited responses that were tuned approximately sinusoidally to limb movement direction, as  
12 has been found for other sensorimotor neurons. The distribution of their preferred directions (PDs)  
13 was highly non-uniform and resembled that of muscle spindles within individual muscles,  
14 suggesting that CN neurons typically receive inputs from only a single muscle. We also found that  
15 the responses of proprioceptive CN neurons tended to be modestly amplified during active  
16 reaching movements compared to passive limb perturbations, in contrast to cutaneous CN  
17 neurons whose responses were not systematically different in the active and passive conditions.  
18 Somatosensory signals thus seem to be subject to a “spotlighting” of relevant sensory information  
19 rather than uniform suppression as has been suggested previously.

## 20 Introduction

21 Proprioception plays a critical role in our ability to move, as demonstrated by the severe deficits  
22 that occur when it is absent (Proske & Gandevia, 2012; Sainburg, Ghilardi, Poizner, & Ghez,  
23 1995). In the periphery, proprioception relies on several classes of mechanoreceptors. While joint  
24 receptors and Golgi tendon organs also contribute, muscle spindles are the primary receptor  
25 underlying proprioception (Proske & Gandevia, 2012). Because each spindle signals stretch of  
26 the muscle within which it is embedded, responses vary with movement direction, peaking for  
27 movements that lead to the greatest stretch. This characteristic may give rise to the sinusoidal  
28 tuning curves that have been described in somatosensory cortex (London & Miller, 2013;  
29 Prud'homme & Kalaska, 1994). A major challenge in studying proprioception is that both spindle  
30 sensitivity and signal transmission through the cuneate nucleus are modulated by descending  
31 inputs (Dimitriou, 2014; Ghez & Pisa, 1972) so proprioceptive responses are liable to differ for  
32 actively generated and passively imposed limb movements.

33 In the present study, we sought to characterize the proprioceptive response properties of CN  
34 neurons in the context of arm movements. First, we examined the degree to which CN neurons  
35 are tuned to reach direction. Observed patterns of spatial tuning suggest that individual CN  
36 neurons receive convergent input from one or only a few muscles. Second, we investigated  
37 whether CN responses to kinematically similar movements depend on whether they are produced  
38 actively or imposed on the limb. We found that the responses of proprioceptive neurons were  
39 typically potentiated during active movement but this systematic potentiation was not observed in  
40 cutaneous neurons. We speculate about why these two streams of somatosensory information  
41 may be modulated differently during active movements.

## 42 Methods

43 All surgical and experimental procedures were fully consistent with the guide for the care and use  
44 of laboratory animals and approved by the institutional animal care and use committee of  
45 Northwestern University under protocol #IS00000367.

#### 46 **Behavioral task**

47 We trained three monkeys to perform a modified center-out (CO) reaching task. Each monkey  
48 grasped a handle attached to two-link manipulandum constrained to a horizontal plane. The  
49 monkeys used the position of the handle to control a cursor displayed on a vertical screen. Each  
50 trial began when the monkey moved the cursor to a target at the center of the screen. After a  
51 random delay of 0.5-1.2 seconds, an outer target appeared in one of eight locations spaced  
52 equally on a circle at a distance ranging from eight to 12 cm from the center target depending on  
53 the monkey (example trajectories in fig 1A). Some experimental sessions with monkey Bu had  
54 only four targets, one along each of the cardinal directions. Following a tone cue and the  
55 disappearance of the center target, the monkey had two seconds to reach to the outer target and  
56 hold it for a random interval between 0.1 and 0.2 seconds. If the monkey correctly performed  
57 these steps, it received a liquid reward.

58 On some trials, we imposed a force perturbation (either 2.0 or 2.5N, depending on the size of the  
59 monkey) during the center-hold period which pushed the hand in one of the eight target directions  
60 with kinematics that roughly matched that of the initial, active reaches (Fig 1A). The robot  
61 delivered the force for 125 ms, begun prior to the appearance of the outer target, but after the  
62 monkey had been holding for at least 0.3 seconds (examples in Fig 1B). In the passive trials, we  
63 confined our analyses of the neural responses to a 130 ms window beginning at bump onset to  
64 exclude the potential reafferent input due to voluntary movement. We analyzed active reaches for  
65 400 ms beyond movement onset, unless otherwise noted. To determine movement onset for  
66 active reaches, we found the time between the go cue and the end of the trial at which the handle  
67 acceleration crossed half its maximum, then walked backwards until we found a hand speed  
68 minimum.

69

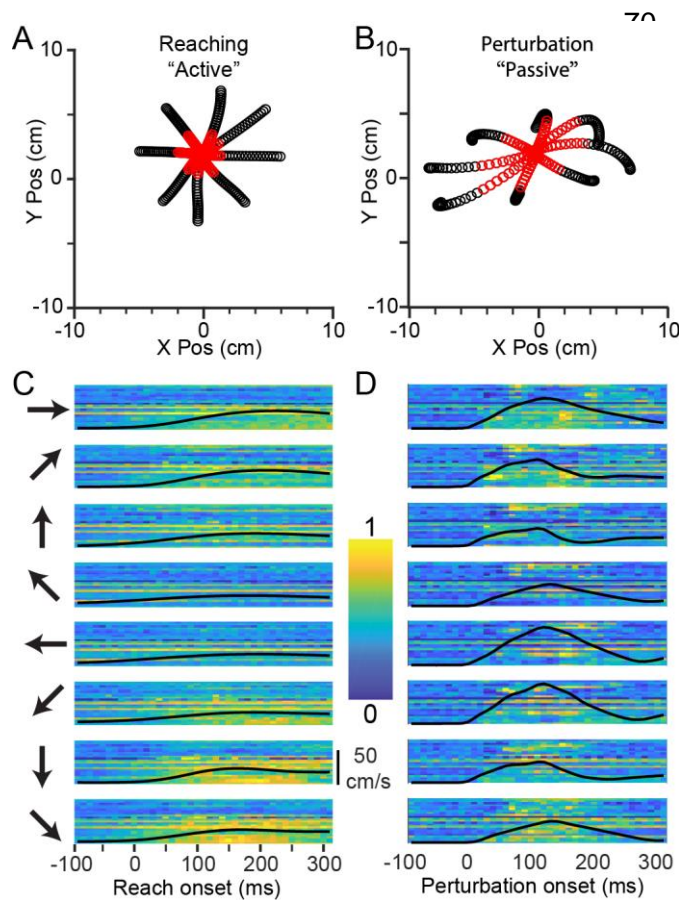

### Fig 1: CN activity during Center-Out reaching and limb perturbation

**A:** X/Y plot of mean handle position during reaching (-100 ms to +300 ms from movement onset), averaged across ~120 trials per direction for monkey Sn. Red symbols are in the window from 0 ms to 130 ms. **B:** Corresponding plot during perturbation trials. Significant asymmetries can be seen due to the non-uniform impedance of the hand. **C:** Neural firing rates during reaching in 8 directions, indicated by the arrows to the left of the plots. Each row of pixels represents a single CN neuron, with color indicating the normalized firing rate. The black line superimposed on the image is the speed of the hand, normalized to the fastest hand speed in either the active or passive condition. **D:** Firing rates during passive trials, as in panel C.

### Data collection

We implanted 96-channel iridium-oxide arrays (Blackrock Microsystems) with an electrode length of 1.5 mm in three monkeys. We targeted all implants for the right CN, which receives inputs from the right arm. Detailed surgical procedures have been described previously (Suresh et al., 2017). For monkey Bu, we used a

98 standard 10x10 shank array. For two subsequent monkeys, we maximized the area of CN  
99 sampled by implanting 8x12 shank rectangular arrays, thereby avoiding most of the gracile and  
100 trigeminal nuclei which lie medial and lateral to CN, respectively (Fig 2A). Receptive field  
101 mappings revealed areas of each array receiving inputs from the lower limb (gracile) and face  
102 (trigeminal). We used this somatotopic organization, which was conserved across time, to  
103 eliminate from consideration neurons with receptive fields not on the upper limb and torso.

104 We simultaneously recorded cursor position, timestamps indicating trial events, and neural data  
105 while the monkey performed the task. We bandpass filtered the neural recordings between 250  
106 Hz and 5000 Hz, and set a voltage threshold manually on each channel to record single neuron  
107 activity in 1.6 ms snippets surrounding each threshold crossing (Fig 2B,C). We sorted the snippets  
108 in Offline Sorter (Plexon Inc.) using waveshape and interspike interval to isolate single neurons.  
109 Neurons in CN can fire spike doublets at approximately millisecond intervals. During these high-  
110 frequency bursts, the waveshape changes, causing two clearly separable clusters in Offline  
111 Sorter. Cross-correlograms between the spike times of snippets in two such clusters have a  
112 characteristic profile, with smaller of the two waveforms reliably lagging the larger waveform  
113 (supplementary fig 1). We combined all the waveforms in these pairs of clusters to avoid double  
114 counting single neurons. We placed all the sorted spikes into 10 ms wide bins and convolved the  
115 resulting counts with a 20 ms, noncausal Gaussian kernel to produce a smoothly varying firing-  
116 rate signal for subsequent analyses.

### 117 Histology

118 To confirm that our implantation procedure was appropriate to target the main CN, we performed  
119 histology on one monkey (monkey La, not included in this paper due to low neuron yield; monkeys  
120 Sn and Cr are still in use in other experiments) that had a CN implant like that of monkey Bu. The  
121 monkey was deeply anesthetized and perfused with saline followed by paraformaldehyde  
122 solution. We removed the brainstem, placing it in 5% Normal Buffered Formalin (NBF) for several  
123 weeks. The tissue was then placed in 30% sucrose in 0.1M Phosphate Buffer (PB) until it sunk.  
124 The dura and microelectrode array implant were removed, and the brainstem was blocked and  
125 mounted on a freezing microtome and sectioned coronally into 50 $\mu$ m sections. Tissue intended  
126 for immunohistochemical processing by vGluT2 staining was placed in 0.1M Tris-Buffered Saline  
127 with 0.1% sodium azide, while tissue for Nissl staining was placed in 5% Formalin.

#### 128 *Immunohistochemistry*

129 The brainstem tissue was rinsed 3x5min in 0.1M Phosphate-Buffered Saline (PBS), and  
130 quenched for 10 min in 3% hydrogen peroxide in PBS. All processing was performed at room  
131 temperature. Sections were rinsed 3x5min in PBS, blocked for 2 hrs in 5% horse serum with  
132 0.05% Tritin X-100 in PBS, and incubated overnight in the primary antibody (MsaVGLuT2,  
133 Millipore, 1:5000, binding specific to vGluT2 receptors (Balaram, Young, & Kaas, 2014)) diluted  
134 in blocking solution. The tissue was then rinsed 3x5min in PBS, and placed in the secondary  
135 antibody solution (HsaMs, Vector Labs, 1:500) diluted in blocking solution for 1hr 45min, rinsed  
136 3x5min in PBS, and incubated in the avidin-biotin complex in PBS for 2 hrs. Sections were rinsed  
137 3x5min in PBS, developed in a solution of 0.5% DAB, 0.05% nickel ammonium sulfate and  
138 hydrogen peroxide in 0.1M PB and given a final rinse in PBS. Sections were mounted on gelatin-  
139 coated slides, dried, and cover slipped with DPX.

#### 140 *Nissl Staining*

141 Sections were mounted out of 0.1M PB onto gelatin-coated slides and left to dry overnight. The  
142 tissue was then placed in a 1:1 chloroform and ethanol solution and sent through an ascending  
143 ethanol series into xylenes for a 15min incubation. The tissue was then put through a descending  
144 ethanol series into water and placed into the Nissl substance for 15min, followed by differentiation  
145 in 70% ethanol with acetic acid, and back through the ascending ethanol series into xylenes. The  
146 sections were cover slipped out of xylenes in DPX.



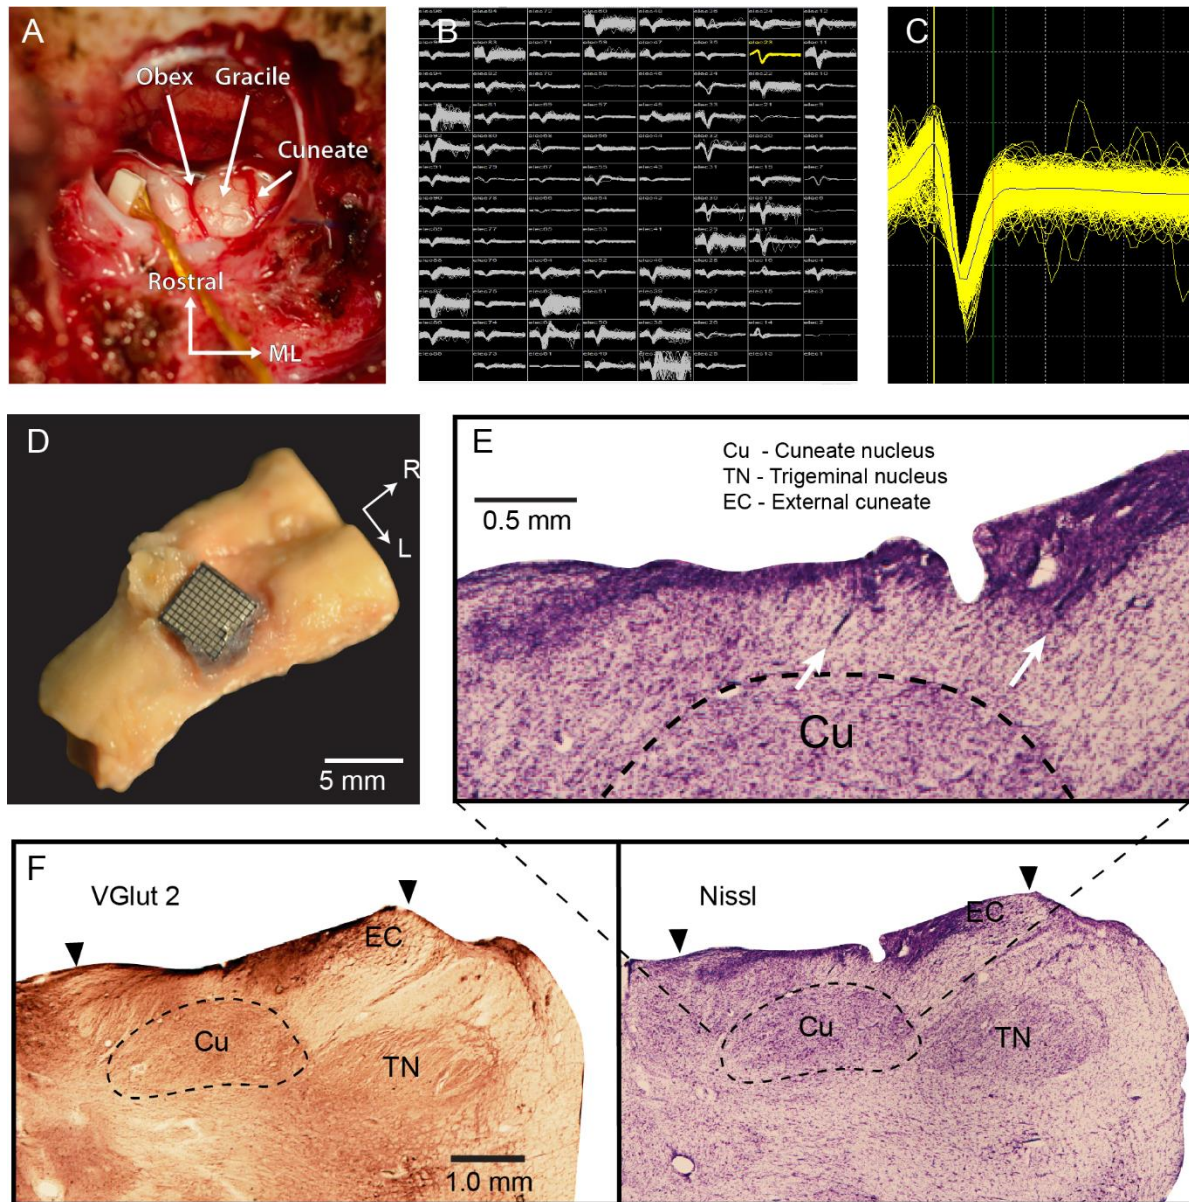

147

148 **Fig 2: Electrode arrays implanted in dorsal brainstem yield single neuron recordings from**

149 **the cuneate nucleus:** A: Intraoperative exposure of the dorsal brainstem and cuneate nucleus following  
150 implantation of a Floating Microelectrode Array (Microprobes for Life Sciences) in an early monkey, not  
151 used in this study. The obex and cerebellar tonsils are in the center of the image. Gracile nucleus is the  
152 structure immediately lateral to the midline, with the main CN further lateral. B: Screenshot of the recordings  
153 across an implanted Utah array (monkey Sn). C: An example single neuron from monkey Sn. D: Histological  
154 examinations of monkey La showed that the implant successfully targeted the main CN. Brainstem with the  
155 Utah array in place. E: Arrows mark electrode tracks leading into the main CN. F: Staining by Vglut2 (left)  
156 and Nissl (right) sharply delineate the boundaries of the CN and trigeminal nuclei. Main CN (Cu) begins at  
157 ~0.5 mm depth and extends to ~2 mm. External cuneate (EC) is more lateral and shallower. Trigeminal  
158 nucleus is farther lateral. Black arrows indicate the mediolateral extent of the Utah array.

159 **Receptive field mapping**

160 During our experiments, we found some neurons that responded to body segments other than  
161 the proximal arm and upper torso. To exclude these neurons from our analysis of limb movement,  
162 we mapped the receptive fields (RFs) of neurons under light ketamine or dexmedetomidine

163 sedation after all reported experimental sessions. These RF mappings typically took one to two  
164 hours, limited by sedation time and animal tolerance for manual mapping. We excluded from our  
165 analyses all neurons that had receptive fields on the forearm, hand, legs, lower torso and head  
166 or face. We also removed neurons that had a stereotypical bimodal passive tuning curve that was  
167 indicative of receptive fields on the hand (for example, see supplementary fig 2). Gross  
168 somatotopic arrangement of RFs was consistent across long time periods (fig 3), allowing us to  
169 target electrodes that reliably had proximal limb RFs.

170 To find neurons with apparent cutaneous input, we brushed the skin around the arm and torso  
171 while listening to pulses from discriminated action potentials. Cutaneous receptive fields were of  
172 highly variable size; some responded to brushing of skin over large areas, while others had focal  
173 receptive fields, often on the hand. Due to methodological limitations, we did not test for A $\delta$   
174 receptive fields, joint receptor afferents, or Golgi tendon organ input.

175 To find putative spindle afferents, we began with passive arm movements to determine  
176 articulations in which the neuronal firing rate increased and used that information to guide  
177 palpation of muscles that lengthened during those articulations. We then applied 100-Hz vibration  
178 to the belly of these muscles, using either an electrodynamic LDS V101 shaker (BRÜEL & KJÆR)  
179 or smaller vibration motors. This stimulus has been shown to activate primary muscle spindle  
180 afferents (Fallon & Macefield, 2007; Proske & Gandevia, 2012). Often, CN neurons responded  
181 only to vibration of small regions of the muscle belly.

182 We classified a neuron as a putative recipient of muscle spindle input (“spindle-receiving”) if it  
183 responded to the lengthening, and either vibration or palpation of a given muscle, but not to  
184 stroking of the skin overlying the muscle. When testing a putative muscle spindle-receiving  
185 neuron, we vibrated the muscle through different patches of skin (by manually displacing the lax  
186 skin) to confirm that the response was caused by vibration of the muscle and not the overlying  
187 skin. We found occasional neurons that responded to vibration of more than one muscle, typically  
188 adjacent synergist wrist flexors. Whether this was due to convergence of multiple muscle  
189 receptors onto a single CN neuron or vibration spreading to adjacent muscles is difficult to  
190 determine with certainty. We defined any neuron that consistently and selectively responded to  
191 passive movements of the limb, but with an RF that we were not able to localize to a single muscle  
192 or cutaneous field as “muscle-like”. This included the spindle-receiving neurons.

### 193 **Motion tracking**

194 In one monkey, we used three video cameras to record the movements of the monkey’s arm. We  
195 triggered frame collection with a 30 Hz pulse transmitted from our data collection system,  
196 simultaneously recorded as an analog input for post-hoc alignment of neural, task, and video data.  
197 We used a publicly available package (DeepLabCut (Mathis et al., 2018)) to infer 10 locations on  
198 the monkey’s arm after training on ~200 hand-labelled reference images. We reconstructed 3D  
199 coordinates of each location based on four separate camera views. Based on the output from  
200 DeepLabCut, we used Opensim (Delp et al., 2007) and a 3D musculoskeletal model of a macaque  
201 arm with 7 degrees-of-freedom (Chan & Moran, 2006) to compute the lengths and velocities of  
202 39 muscles. We binned these data at 10 ms and aligned them in time with the neural data.

### 203 **Spatial tuning curves and preferred directions**

204 We calculated the mean firing rate and its 95% confidence interval for each neuron across trials  
205 in a 130 ms period beginning at perturbation onset, or in active trials, the 200 ms surrounding the  
206 peak hand speed in each direction. In addition to the classic method of fitting a sinusoid to trial-  
207 averaged data (Georgopoulos, Kalaska, Caminiti, & Massey, 1982; Prud’homme & Kalaska,  
208 1994), our lab has begun to compute preferred directions (PDs) by fitting models from hand  
209 velocity to the smoothed firing rates of each neuron using Poisson Generalized Linear Models

210 (GLMs) (Chowdhury, Glaser, & Miller, 2020). This latter approach is sensitive to variability in reach  
211 kinematics across trials and can be applied to random-target reaching tasks as well as center-out  
212 tasks. Here, we concatenated all trials and placed the data in 50 ms bins. In Eq 1,  $\lambda$  and  $\alpha$   
213 represent the time-varying and baseline firing rates (spikes/sec), respectively, of a given neuron.  
214  $\beta$  is the weight vector for the x and y components of velocity. We computed a PD from the GLM  
215 by taking the inverse tangent of the ratio of the y and x velocity weight vectors,  $\beta$ . We used  
216 bootstrap sampling across data points to generate 95% confidence intervals on the PD.

217

$$\lambda = e^{\alpha + \beta x} \quad (1)$$

218

219

$$pseudoR^2 = 1 - \frac{\ln \hat{L}(M_{Full})}{\ln \hat{L}(M_{Intercept})} \quad (2)$$

220

## 221 **Neural tuning metrics**

222 We classified neurons as “Active Tuned” if there were statistically significant differences in an F-  
223 test across reaching directions with a cutoff of  $p < 0.01$ . Similarly, neurons were “Passive Tuned”  
224 if they met the same criterion for bump-evoked responses. Neurons could be “Active Tuned”,  
225 “Passive Tuned”, or both. We considered neurons “Sinusoidally Tuned” if the PD confidence  
226 interval had a total width of 90 degrees or less. Neurons could be “Active Sinusoidally Tuned”,  
227 “Passive Sinusoidally Tuned” or both.

228 We found the time a neuron modulated relative to movement onset for each target direction  
229 (supplementary fig 3) by computing the trial-averaged firing rate in 10 ms bins from 100 ms prior,  
230 to 200 ms after movement onset. We found the first time at which this average rate was outside  
231 the 99.9 percentile of the baseline firing rate (from 150 ms to 100 ms prior to movement onset)  
232 for two consecutive bins. We computed the latency for passive movements in a similar manner,  
233 using a baseline window from 100 to 50 ms prior to perturbation onset, testing for changes from  
234 50 ms prior to the bump to 100 ms after the bump.

## 235 **Analysis of simulated spindle-receiving CN neurons**

236 To determine the extent to which the representation of movement direction within CN resembles  
237 that of the periphery, we compared the spatial tuning of CN neurons to that expected from their  
238 apparent muscle spindle inputs. This process had several steps. We computed typical length  
239 changes of arm muscles while a monkey performed the CO task using motion tracking data from  
240 a single session of monkey Sn. We simulated spindle firing rates by passing the lengthening  
241 velocity of each muscle through a power law with coefficient of 0.5 (Houk, Rymer, & Crago, 1981).  
242 We set firing rates during muscle shortening to zero. We scaled each spindle output to a firing  
243 rate of 50 Hz at near-maximal lengthening speed (90<sup>th</sup> percentile). Treating this rate as the time-  
244 varying  $\lambda$  of a Poisson distribution, we sampled randomly to generate firing rates for each  
245 simulated spindle on each trial. Finally, we used a linear model to determine PDs for the simulated  
246 spindles from the velocity of the hand as we did for CN neurons.

247 We computed the PDs for simulated CN neurons that each received input from a single randomly  
248 chosen muscle spindle from muscles distributed throughout the proximal arm. The number of  
249 muscle spindles in each muscle is roughly proportional to the square root of the muscle’s mass  
250 (Banks & Stacey, 1988). We estimated the mass of each muscle by multiplying the pulling



251 force (proportional to cross-sectional area) by the length of the muscle, both of which were  
252 included in our musculoskeletal model. Thus, we assumed that the number of muscle spindles in  
253 each muscle was proportional to the square root of its pulling force times the length of the muscle.  
254 We simulated 1000 muscle spindle-receiving CN neurons, apportioned across the muscles on  
255 this basis. From this population, we computed PD distributions based on the kinematics for active  
256 reaches.

### 257 **Sensitivity analyses**

258 To estimate the sensitivity of CN neurons to hand movements, we used the x and y components  
259 of hand velocity as input to linear models that predicted the smoothed firing rate of each neuron.  
260 The length of the weight vector was that neuron's sensitivity to velocity and quantifies the  
261 expected change in firing rate for an increase of one cm/s in the direction of the neuron's velocity  
262 PD.

263 Due to the anisotropy of the limb and idiosyncrasies of a monkey's task performance, the  
264 perturbations did not produce kinematics perfectly matching those of the reach. If firing rates are  
265 a nonlinear function of speed, such as the power law observed in muscle spindles (Houk et al.,  
266 1981), mismatched movement speeds across conditions would bias the apparent sensitivity. To  
267 address this potential confounding factor, we matched the input velocity domains of the data used  
268 to train the models. We found separate static 2D distributions of firing rates as a function of  
269 velocity for the active and passive trials. For each reach-velocity datapoint, we found the distance  
270 to the nearest passive datapoint, in an approach analogous to a nearest neighbor method. If this  
271 distance was greater than 3 cm/s, we excluded the active point, as it had no near neighbors. We  
272 repeated this process to exclude passive data that did not have active neighbors. The result was  
273 training data in which the active and passive movements had matched velocity domains. The data  
274 windowing did not substantially alter the results of the sensitivity analyses; we demonstrate the  
275 data windowing and its effects on the results of this analysis in supplementary fig 4.  
276

277 To compute whether a neuron's movement sensitivity differed significantly between the active  
278 and passive conditions, we bootstrapped, across trials, a confidence interval on the difference  
279 between active and passive sensitivities for each neuron. If the mean of this metric was positive  
280 and the 95% confidence interval did not include zero, the neuron was more sensitive in the active  
281 condition; if the mean was negative and the 95% confidence interval did not include zero, the  
282 neuron was significantly less sensitive.

## 283 **Results**

284 We recorded the responses of neurons with receptive fields (cutaneous or proprioceptive) on the  
285 proximal arm while the animals performed a modified Center-Out reaching task that included force  
286 pulse perturbations applied to the robot handle during the center-hold period. Unless otherwise  
287 specified, the data were obtained in two sessions with each monkey, separated by at least three  
288 weeks to reduce the likelihood of double-counted neurons.

### 289 **Somatotopic organization of CN is similar across monkeys**

290 First, we examined the somatotopic organization of the CN by systematically mapping the  
291 receptive field types and locations across the arrays. Using intra-operative photos of array  
292 placement, we found the coordinates of each array relative to the obex. We then plotted the most  
293 common RF location (i.e., legs, trunk etc.; Fig 3A) and modality (muscle-like, cutaneous; Fig 3B)  
294 for each electrode. Receptive field locations varied systematically along the minor axis cutting  
295 through CN (dotted arrows in Fig 3A, projected onto axis in 3C). This progression reflects the  
296 transition from the gracile nucleus to CN, and finally to the trigeminal nucleus. RF locations on



297 the arm were largely conserved along the major axis, possibly corresponding to the CN  
298 subnucleus known to receive primary inputs from distal cutaneous receptors (Loutit, Vickery, &  
299 Potas, 2021). These results are consistent with our histological results from one monkey (Fig 2F),  
300 which indicate that the array likely penetrated through the external CN, to record from rostral  
301 portions of the main CN. We could not confirm this independently for all monkeys, for which  
302 histology has not been completed. The orientation of the major and minor axes departs from  
303 strictly mediolateral because of the sharply lateral bend of the brainstem and nuclei just rostral  
304 to the obex. RF type varied along the major axis, with muscle-like response properties slightly more  
305 common farther from the obex (fig 3B,D).

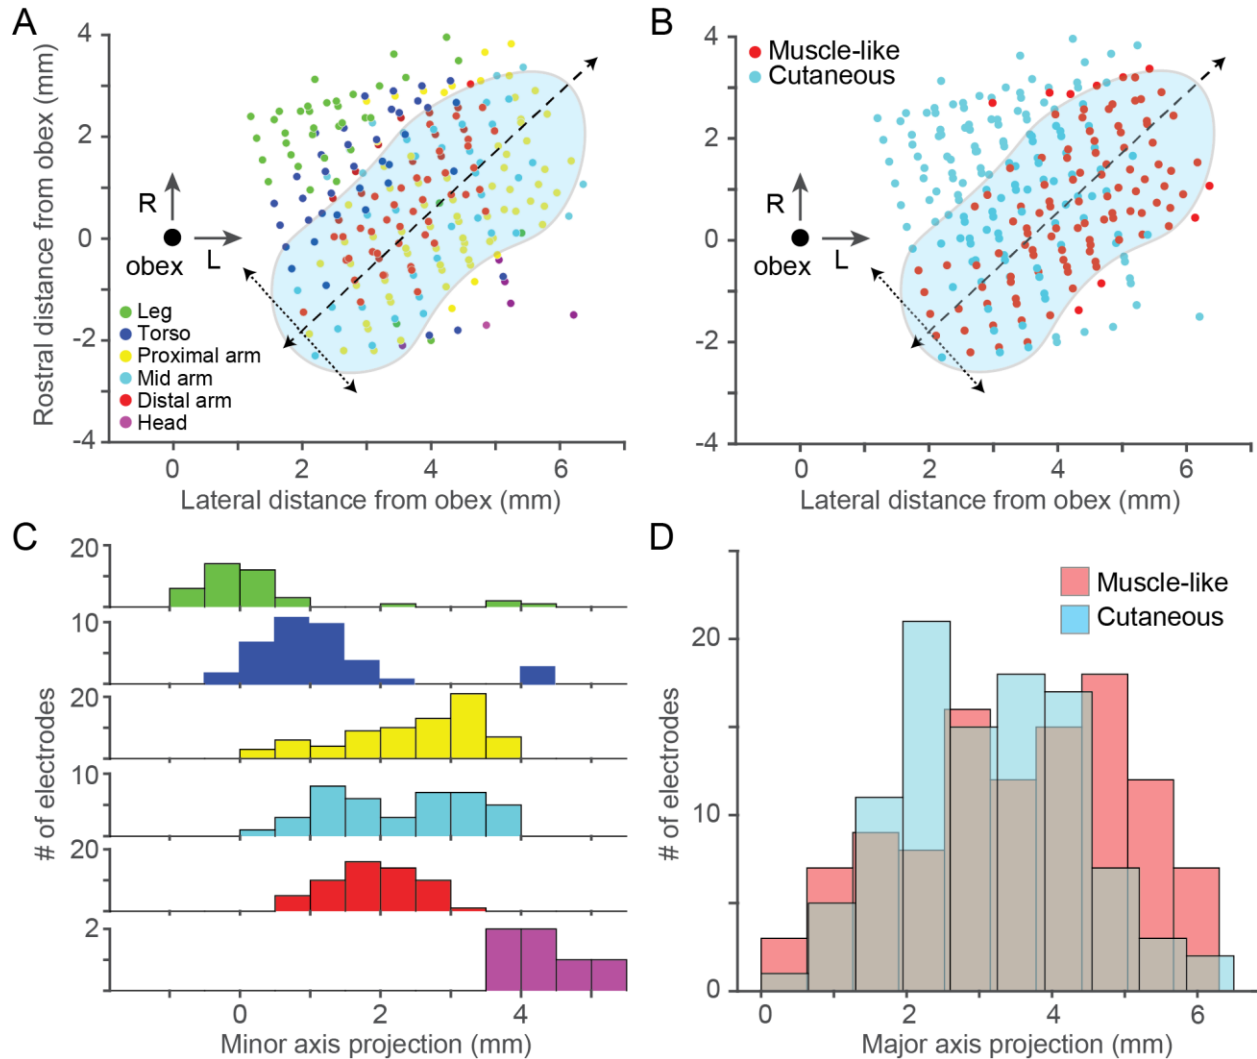

306

307 **Figure 3: Receptive field location and modality across monkeys.** A: Scatter plot of receptive field  
308 locations as a function of the location of the recording site relative to obex (large black point). Each point  
309 represents a recording site in the dorsal medulla from one monkey. Color of points denotes the most  
310 common receptive field location for a given electrode. Approximate location of CN is show in blue, with its  
311 major (dashed) and minor (dotted) CN axes overlaid. RF locations appear to vary primarily along the minor  
312 axis. "Proximal arm" included shoulder related receptive fields, "Mid arm" included RFs around the elbow,  
313 and "Distal arm" included all forearm and hand related RFs. B: Modality as a function of electrode location.  
314 As in A, symbol color indicates the most common modality. C: Histogram of receptive field location along  
315 the minor axis in A, relative to the obex. RFs progressed systematically along minor axis from lower limb

316 (green) to head/face (purple). D: Histogram of receptive field type along the major axis. There was a weak  
317 bias for muscle-like RFs away from the obex.

### 318 Localized vibratory stimulation robustly activates CN neurons

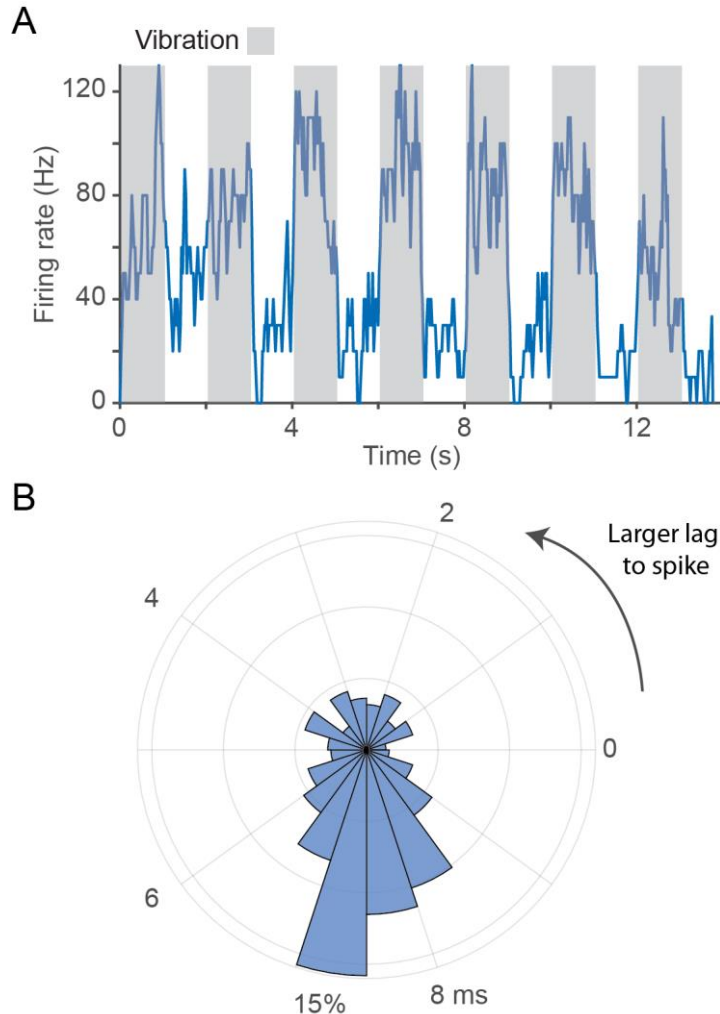

**Fig 4: Responses to muscle vibration of a spindle-receiving neuron.** *A:* Response of a CN neuron to 100-Hz vibration applied to the brachialis muscle belly. Grey regions indicate the stimulation epoch. The neuron's firing rate rose quickly to 100 Hz and returned to baseline immediately when the vibration stopped. *B:* Phase locking between the vibration peaks and action potentials. We computed a phase histogram between the peak voltage applied to the stimulation and evoked spikes. The peak at ~7.5 ms indicates that the vibrator peak led this neuron's spikes with a reliable latency. Some of the breadth of the peak is certainly due to the sinusoidal nature of the stimulus.

Having identified joints that appeared to be within the RF of a given CN neuron, we characterized the spindle input to that neuron by applying vibration to the belly of muscles that articulate that joint. Figure 4 shows the response of a CN neuron to vibration of the brachialis muscle, presumably due to the activation of its muscle spindles. As in this example, neural responses typically increased and became phase locked with the vibration. We found that many of these spindle-receiving neurons required the vibration be delivered quite precisely within a given muscle to be effective, suggesting that CN neurons may not even receive input from spindles throughout a given muscle.

Next, we examined the degree to which CN neurons receive input from multiple muscles. In most cases, CN neurons responded to passive manipulation (or vibration) of a single joint or muscle. In a few cases (<10), we found evidence that signals from multiple (typically agonist) muscles converged onto a single CN neuron. We never found neurons that responded to muscles that were not in near proximity to one another nor did we find neurons that exhibited both cutaneous and proprioceptive responses, though due to time constraints on sensory mappings, convergence may be broader

---  
363

364 than our mappings suggest.

## 365 CN neurons are tuned to movement direction

366 Figure 5 shows the responses of two representative CN neurons measured during ~50 reaches  
367 in each of eight directions, a cutaneous neuron with an RF on the axilla (Fig. 5A,B) and a spindle-  
368 receiving neuron with an RF on the triceps muscle (Fig 5C,D). The firing rates of both neurons  
369 varied with movement directions, peaking for a single target direction, with similar tuning during  
370 reaching and passive limb displacement.

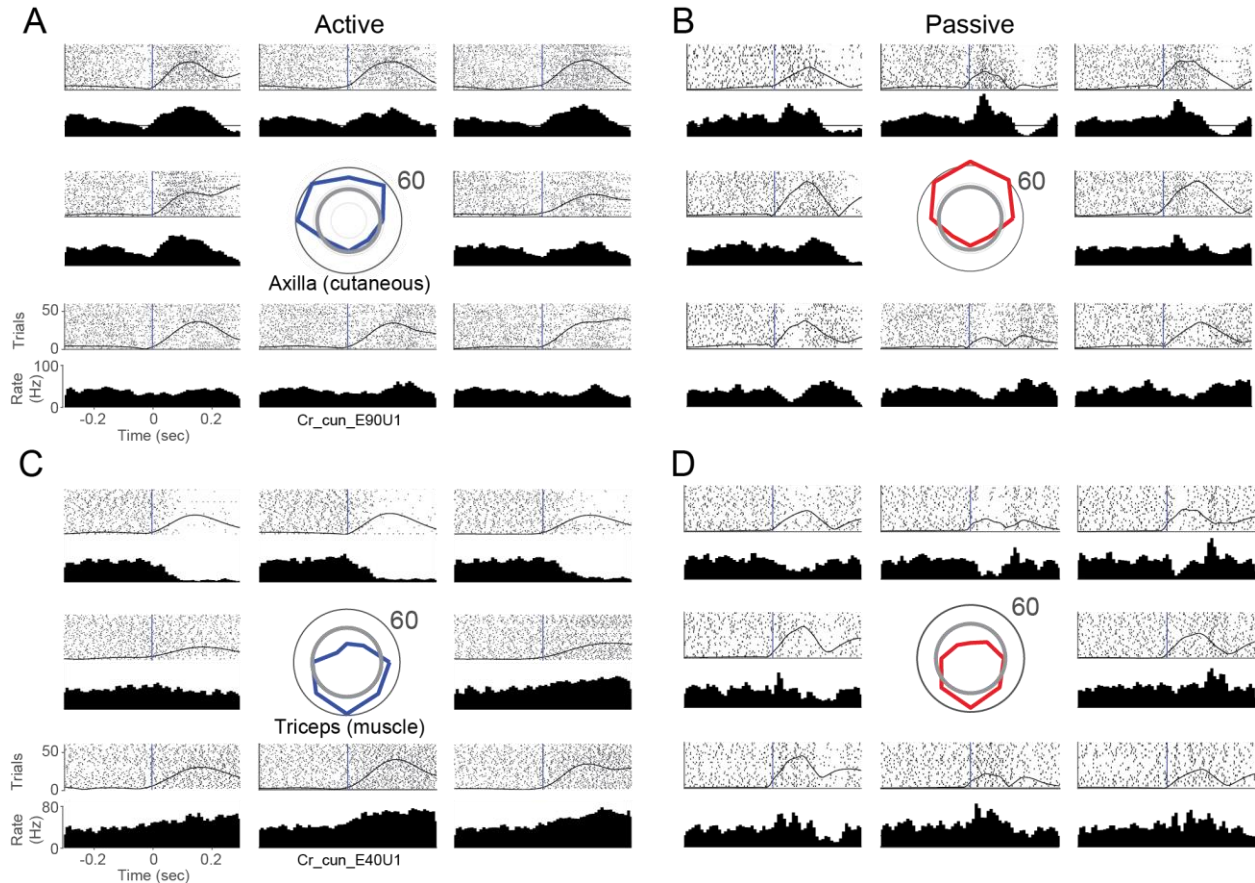

371

372 **Fig 5: CN neurons respond robustly to active and passive arm movements:** A: Responses of a CN  
373 neuron during active reaches in eight directions. RF mapping revealed that the neuron received input from  
374 cutaneous receptors in the axilla. The tuning curve (centered, blue) indicates the firing rate averaged across  
375 the 130 ms after movement onset in each direction. The grey circle illustrates the baseline rate before  
376 movement. Rasters and histograms are positioned relative to the tuning curve, to correspond to the  
377 direction of movement. The black vertical lines indicate movement onset. The hand speed is represented  
378 as a solid black line imposed over the rasters. B: Same neuron as A, for passively evoked arm movements.  
379 Passive tuning curve plotted in red at center. C,D: A second neuron, presented as in A, B, that appeared  
380 to receive input from receptors in the triceps muscle spindle.

381 During active reaching movements, trial-averaged firing rates of muscle-like neurons in CN were  
382 generally well fit by a cosine tuning model (Georgopoulos et al., 1982; Prud'homme & Kalaska,  
383 1994), with average fits of  $r = 0.76$ . Cutaneous neurons yielded, on average, a cosine fit of 0.62,  
384 which was not statistically different from the muscle-like population (t-test p-value  $\approx 0.10$ ). These  
385 values are very similar to those reported previously for neurons in motor and somatosensory  
386 cortices (Georgopoulos et al., 1982; Prud'homme & Kalaska, 1994) (See supplemental fig 5 and  
387 supplemental Table 1). For compiled firing rate, sensitivity, and latency metrics, see supplemental  
388 fig 6.

389 Other neurons exhibited idiosyncratic responses, including unexpected dynamics at movement  
390 onset, (supplementary fig 7), potential GTO inputs (supplementary fig 8), cutaneous responses  
391 from the hand (supplementary fig 2) and forearm (supplementary fig 9).

### 392 **Distribution of CN PDs can be predicted from single-muscle receptor inputs**

393 Next, we examined the distribution of PDs across the population of CN neurons and found it to  
394 be highly non-uniform (fig 6A,B): A large proportion of PDs fell within a single lobe pointed toward  
395 the body (near  $-90^\circ$ ) in both the active and passive conditions. This observation was consistent  
396 across monkeys (supplemental fig 10). To shed light on this result, we simulated a population of  
397 CN neurons, each with spindle input from a single muscle, inspired by the very limited  
398 convergence we found for vibration-evoked responses in muscle-like neurons (see Methods). The  
399 resulting distribution of simulated PDs featured a mode at  $-90^\circ$ , much like that of the CN  
400 neurons, but also another mode at  $90^\circ$  (Fig 6C).

401 This strongly bimodal distribution of simulated spindle-driven neurons reflects the biomechanical  
402 non-uniformity of muscles, which predominantly drive arm movements toward and away from the  
403 body. A consequence of this anisotropy in muscle pulling directions is that we can push and pull  
404 objects with greater strength than we can move them from side to side. The lack of neurons with  
405 PDs pointing away from the body suggests that we recorded neurons with a somatotopically  
406 biased set of RFs, namely a preponderance of neurons driven by lengthening of elbow extensors  
407 and shoulder flexors and lacking neurons driven by their complements. When we limited the  
408 inputs to our simulated neurons based on the mapped RFs of our recorded CN neurons, the two  
409 PD distributions matched more closely (fig 6D,E). Even at the single-neuron level there was a  
410 reasonable correspondence between the PD of the recorded neurons and their modeled  
411 counterparts. While prediction accuracy was poorer for CN neurons that received inputs from  
412 muscles in the back (which tend to be multi-layered, broad, and biomechanically dissimilar),  
413 accuracy for CN neurons that received inputs from the arm was high (supplementary fig 11).  
414 These results are consistent with the view that CN neurons receive input primarily from individual  
415 muscles.

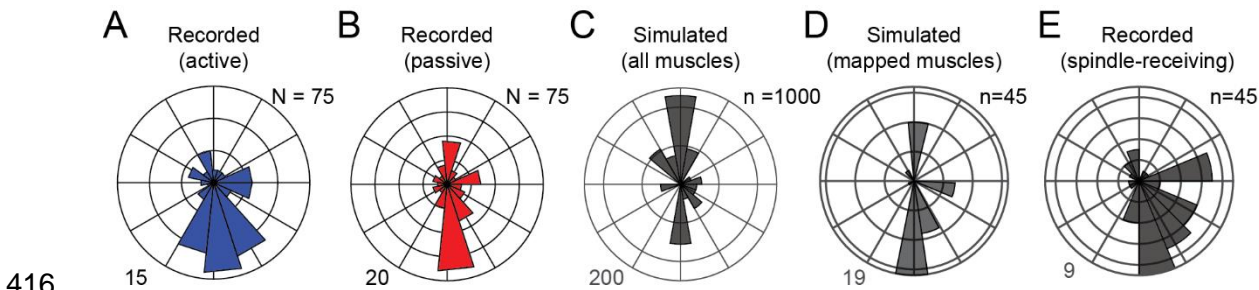

416  
417 **Figure 6: Preferred direction distributions for simulated and actual CN neurons.** A) Polar  
418 histogram of active PDs combined across monkeys (N= 75 neurons). Outer circle represents 15  
419 neurons with PDs in that bin. All subsequent plots in this figure have the same layout as A.  
420 Neurons included in this figure were sinusoidally tuned in both active and passive conditions, from  
421 CN regions of the array, and appeared to receive inputs from the upper trunk, shoulder or proximal  
422 arm. B) Passive PD distribution for CN neurons. C) PD distribution for all 1000 simulated CN  
423 neurons receiving input from a muscle spindle of a single randomly chosen muscle in the proximal  
424 arm. D) PD distribution for simulated CN neurons, having inputs corresponding to those actually  
425 mapped for recorded neurons. E) Actual PD distribution of the same spindle-receiving neurons in  
426 D.

427 **Directional tuning of active and passive responses are similar**



428 Next, we examined the directional tuning during actively generated movements and compared it  
429 to directional tuning during imposed limb perturbations, focusing on neurons that exhibited  
430 sinusoidal directional tuning. First, we found that the depth of modulation was correlated across  
431 conditions: Neurons that were strongly tuned in the active condition were also tuned in the passive  
432 one (fig 7A). Second, we found that PDs were typically consistent across the two conditions  
433 (Figure 7B), with more than 50% of neurons exhibiting active and passive PDs that differed by  
434 less than  $30^\circ$  (Figure 7C). From these data, we conclude that CN neurons convey information  
435 about direction that is largely consistent regardless of whether limb movements are generated  
436 actively or imposed.

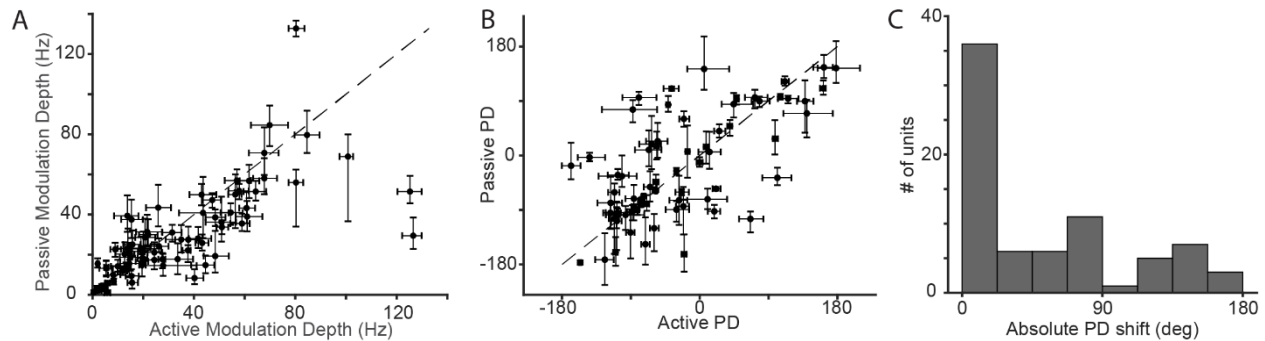

437 **Fig 7: CN neurons have similar active and passive tuning:** A: Each point represents the  
438 modulation depth of a neuron in the passive condition plotted against its active modulation depth. Error  
439 bars denote the bootstrapped 95% confidence interval of the modulation depth computed across trials.  
440 Neurons in the figure have the same inclusion criteria as those of Fig 6A. B: Each point represents the  
441 active and passive tuning direction for single proximal limb CN neurons that were sinusoidally tuned in both  
442 conditions. The black dashed line is the unity line. The error bars denote the bootstrapped 95% confidence  
443 interval on the PD. C: Histogram of the absolute angle between active PDs and passive PDs.

#### 445 **Response strength differs in the active and passive conditions**

446 CN responses to tactile stimulation have been shown to be suppressed during movement (Ghez  
447 & Pisa, 1972; He, Suresh, Versteeg, Rosenow, & Bensmaia, 2019), a phenomenon that likely  
448 accounts in part for the documented decrease in cutaneous sensitivity during movement (Williams  
449 & Chapman, 2000, 2002; Williams, Shenasa, & Chapman, 1998). With this in mind, we examined  
450 the degree to which such a gating phenomenon occurred in our sample of CN responses.  
451 Specifically, we compared the strength of the response evoked in CN neurons in the active vs.  
452 passive movement conditions. As the kinematics were not identical in the two conditions, we  
453 selected a subsets of trials with similar movement kinematics. Furthermore, we focused the  
454 analysis on the responses of 70 neurons whose responses were sinusoidally tuned for at least  
455 one of the two conditions, 56 of which were muscle-like and the rest cutaneous.

456 Of the muscle-like neurons, ~40% (22) were potentiated during active reaching and 14% (8) were  
457 attenuated; the remaining 46% produced responses that did not differ significantly in the two  
458 conditions (Fig 8A). Among the muscle-like neurons, the results were similar whether or not they  
459 were spindle-receiving. Of 14 cutaneous neurons with RFs on the upper torso and proximal arm,  
460 28% (4) were significantly potentiated, another 28% were attenuated, and the remainder were not  
461 significantly affected. To quantify the degree of potentiation or attenuation, we projected the  
462 responses onto a “potentiation axis” orthogonal to the unity line on fig 8B. Positive projections  
463 indicate potentiation, while negative projections indicate attenuation. As a population, muscle-like  
464 neurons were potentiated during reaching, while cutaneous neurons were not (Fig 8C; two-sided  
465 t-test  $p < 0.05$  for proprioceptive neurons,  $p > 0.70$  for cutaneous neurons). We found that spindle-  
466 receiving neurons as well as the more general class of muscle-like neurons were similarly  
467 potentiated. We also examined the consistency of the potentiation, which varied considerably

468 across neurons for all monkeys and found the potentiation was quite consistent across the first  
 469 and second halves of experimental sessions (figure 8D). Both the sign and magnitude of the  
 470 potentiation were well preserved for virtually all neurons, cutaneous as well as muscle-like.

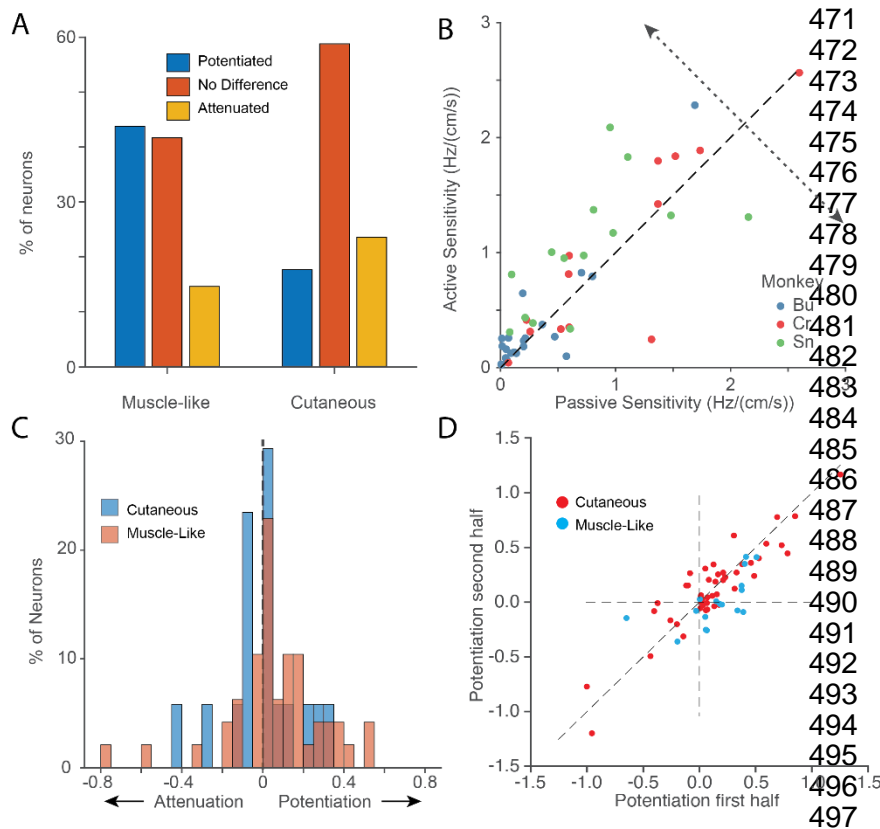

471 **Fig 8: Sensitivity of neurons**  
 472 **is modulated by movement**  
 473 **context:** A: Distribution of  
 474 sensitivity changes with  
 475 reaching across all neurons by  
 476 modality (across two  
 477 experimental sessions from  
 478 each monkey). B: Scatter plot  
 479 of active sensitivity as a  
 480 function of passive sensitivity  
 481 for all muscle-like CN neurons  
 482 that were sinusoidally tuned in  
 483 either condition with RFs that  
 484 didn't include the distal arm.  
 485 The potentiation axis (dotted  
 486 line) indicates change in  
 487 sensitivity of active reaching vs.  
 488 passive perturbation. Symbol  
 489 color indicates the monkey  
 490 from which the neuron was  
 491 recorded. C: Magnitude of the  
 492 potentiation across neurons.  
 493 While muscle-like neurons  
 494 (red) yielded positive gains,  
 495 cutaneous neurons were not  
 496 more significantly more prone  
 497 to potentiation or attenuation

498 (blue). Overlap between these distributions appears dark red. D: Scatter plot of the potentiation effect in  
 499 the second half of a given experimental session plotted against that in the first half, for all monkeys.

## 500 Discussion

501 In this study, we examined the representation of arm movements – actively generated and  
 502 passively imposed – in the CN of three monkeys. First, we found that CN neurons are strongly  
 503 activated during both types of movement, typically with sinusoidal directional tuning that is largely  
 504 conserved between the two conditions. Second, our inability to drive CN neurons with vibrations  
 505 applied to more than one muscle, and the similarity of actual CN preferred directions to those  
 506 derived from the simulated spindle responses of single muscles, suggest that most CN neurons  
 507 receive input from a single muscle. Third, while directional tuning is similar in the active and  
 508 passive conditions for muscle-like CN neurons, their sensitivity to movement is potentiated during  
 509 active reaching. This potentiation is not observed in cutaneous neurons.

### 510 Convergence of multiple muscles onto CN neurons is limited

511 We never observed cross-modal convergence and found only infrequent convergence from  
 512 multiple muscles. Those few neurons that appeared to have multi-muscle RFs received inputs  
 513 from multiple forearm muscles. It may be that forearm muscles have higher levels of convergence  
 514 than other muscle groups. It is possible that this finding reflects greater mechanical coupling  
 515 between the parallel forearm muscles (Hummelsheim & Wiesendanger, 1985), but the precise  
 516 placement of the vibrator, even within a single muscle, required to evoke firing argues against this  
 517 interpretation.

518 Prior studies investigating whether afferent signals from multiple muscles converge onto individual  
519 CN neurons have yielded contradictory results. One study found that CN neurons typically  
520 respond to stretch of only one forearm muscle (Hummelsheim & Wiesendanger, 1985), with only  
521 about 25% of neurons exhibiting convergence from another muscle. In contrast, another study  
522 found that 87% of CN neurons could be excited by electrical stimulation of more than one  
523 peripheral nerve. A high percentage responded even to stimulation of both superficial and deep  
524 radial nerves (purely tactile and proprioceptive, respectively) suggesting cross modal in addition  
525 to cross-muscle convergence (Witham & Baker, 2011). A more recent study helps to reconcile  
526 these findings; Bengtsson et al. found that while CN neurons often receive input from a large  
527 number of afferents, only a small number of them strongly activate CN; the majority are “silent  
528 synapses” (Bengtsson, Brasselet, Johansson, Arleo, & Jörntell, 2013). The high levels of  
529 convergence observed with peripheral nerve stimulation may result from nonphysiological levels  
530 of synchronous inputs.

531 This evidence of limited convergence onto CN is supported by our ability to predict the PDs of  
532 individual spindle-receiving neurons based on the single dominant muscle in their receptive field.  
533 This was true both at the single-neuron level (primarily for CN neurons that received inputs from  
534 the arm; supplementary fig 11) as well as the population level, with one caveat. While the major  
535 node of the CN PD distribution pointing toward the body closely matched that of the simulated  
536 distribution. The latter had an additional prominent lobe pointing away from the body, which was  
537 only weakly represented in the CN distribution. This bimodal PD distribution was predicted  
538 previously for both muscle spindles (Sandbrink et al., 2020) and neurons in primary motor cortex  
539 (Lillicrap & Scott, 2013). The discrepancy between simulated and actual CN PD distributions may  
540 be explained by a sampling bias introduced by the fixed depth of the recording electrodes.  
541 Consistent with this idea, somatotopic organization in DCN-complex nuclei has been observed  
542 not only along the mediolateral and rostro caudal axes but also in depth (Loutit et al., 2021; Suresh  
543 et al., 2017). Previous investigations have found proprioceptive CN neurons over 3.5 mm deep  
544 compared to our 1.5 mm, suggesting that we may be sampling less than half of the depth-extent  
545 of CN with this array design.

546 For the most part, active and passive PDs were similar for CN neurons, with more than 50%  
547 differing by less than 30°. There were occasional discrepancies, which likely arise from a  
548 combination of factors including PD estimation uncertainty (Stevenson et al., 2011), altered  
549 descending drive (including gamma drive, sup. Fig 7) or convergence from unmodeled receptors,  
550 such as GTOs (sup. Fig 8).

### 551 **Modulation of CN response sensitivity during active and passive arm movements**

552 Tactile perceptual sensitivity is attenuated during self-generated movement (Juravle, Binsted, &  
553 Spence, 2017; Schmidt, Schady, & Torebjörk, 1990). Consistent with this observation, the  
554 magnitude of evoked potentials in somatosensory cortex is also reduced during reaching  
555 (Rushton, Rothwell, & Craggs, 1981). This attenuation has been shown to occur at least in part  
556 at the level of CN, where experiments in cats showed that CN output is attenuated both by  
557 stimulation of the motor cortices (Andersen, Eccles, Oshima, & Schmidt, 1964) and during active  
558 stepping movements (Ghez & Pisa, 1972). These effects are at least partially mediated by  
559 presynaptic inhibition in the cuneate (Andersen, Eccles, Schmidt, & Yokota, 1964). These  
560 observations led to the hypothesis that afferent signals might be attenuated to reduce sensory  
561 noise, particularly during rapid, ballistic movements intended to be executed without feedback  
562 (Cohen & Starr, 1987; Rushton et al., 1981). However, more recent studies reveal a more  
563 nuanced picture: particular CN responses are potentiated when stimulation is applied to a cortical  
564 site with an RF that matches that of CN and attenuated when the RFs do not match (Palmeri,  
565 Bellomo, Giuffrida, & Sapienza, 1999). We found that about 40% of all CN muscle-like neurons

566 were potentiated in the active condition, while only 15% were attenuated (though some quite  
567 markedly).

568 The responses of cutaneous nerve fibers have been shown to carry limb-kinematic information  
569 comparable to that of muscle spindles (Edin, 1992). Furthermore, activation of cutaneous  
570 afferents in a manner that mimics that occurring during arm movement biases the conscious  
571 perception of hand location (Collins, Refshauge, Todd, & Gandevia, 2005; Edin & Johansson,  
572 1995). To the extent that cutaneous signals complement muscle-derived ones to support  
573 proprioception, one might expect that cutaneous signals would also be potentiated during active  
574 movements. In our experiments, modulation of cutaneous neurons was smaller than that of  
575 muscle-like neurons and was equally likely to be attenuation as potentiation. These widely varied  
576 patterns of sensitivity change, and their consistency within experimental sessions (Fig 8C),  
577 suggest that they are fine-tuned across muscles and receptors, perhaps “spotlighting” relevant  
578 information rather than the result of a more global effect.

579 CN neurons receive input both directly from peripheral receptors and by way of spinal  
580 interneurons in laminae 3-7. One study estimates that in the rat, between 30-40% of dorsal column  
581 afferents to CN are these second-order neurons (Giesler, Nahin, & Madsen, 1984; Loutit et al.,  
582 2021). Thus, gain modulation in CN might have a spinal origin. One study found cutaneous  
583 afferent input to cervical spinal interneurons to be consistently attenuated during active  
584 movements, while proprioceptive information was potentiated (Confais, Kim, Tomatsu, Takeji, &  
585 Seki, 2017). That study differed from ours in the location of the receptive fields, ours focusing on  
586 neurons with proximal limb RFs, and the earlier study, the hand and distal arm. The discrepancy  
587 between our studies may result from the very different roles of distal cutaneous neurons for  
588 stereognosis and object interactions, and proximal arm neurons (both cutaneous and muscle) for  
589 control of reaching and a sense of limb position and movement. Importantly, our experiments  
590 could not distinguish between altered gamma drive, spinal modulation of spinal transmission, or  
591 descending inputs to CN as the source for the amplification of proprioception in our recordings.

### 592 **CN responses: A lens into gamma drive**

593 The influence of gamma drive on spindle responses during active reaching movements is  
594 understood only qualitatively (Dimitriou & Edin, 2008; Proske & Gandevia, 2012). Our ability to  
595 record CN neurons during reaching may provide an indirect view of gamma modulation of spindle  
596 activity. In the passive condition, many spindle-receiving CN neurons reduced their firing for non-  
597 preferred directions, responses presumably associated with shortening of the muscle in their RF.  
598 However, these same neurons often did not have decreased rates during active movement in the  
599 same directions, suggesting that gamma drive may have prevented the spindles from falling silent.  
600 In fact, we often saw transient *increases* in the firing rate in these anti-preferred directions near  
601 movement onset (supplementary fig 7). These effects are consistent with increased gamma drive,  
602 though we cannot rule out other effects of descending modulatory input to the spinal cord or CN.

### 603 **Use of CN as a neural interface site for somatosensory replacement**

604 With the increasing sophistication of efferent brain computer interfaces that can allow paralyzed  
605 patients to move (Collinger, Gaunt, & Schwartz, 2018; Hochberg et al., 2006; Lee et al., 2018),  
606 attention has swung to the complementary problem: restoring touch and proprioception to these  
607 patients by activating the somatosensory system electrically (Bensmaia & Miller, 2014; Flesher et  
608 al., 2016; Tabot et al., 2013). Somatosensory cortical stimulation has been used in both intact  
609 monkeys and paralyzed patients to elicit somatosensory percepts. Humans with electrode arrays  
610 implanted in the primary somatosensory cortex report strong, repeatable sensations from  
611 stimulation, including pressure, tingling, and vibration. However, proprioceptive-like percepts  
612 have been rare or absent (Collinger et al., 2018; Flesher et al., 2016; Lee et al., 2018). Likewise,  
613 targeted muscle reinnervation (TMR) and peripheral nerve stimulation have shown promise in



614 restoring sensation in limb amputees (Horch, Meek, Taylor, & Hutchinson, 2011; Schiefer,  
615 Graczyk, Sidik, Tan, & Tyler, 2018; Tan et al., 2014), in part because the simpler coding and  
616 additional peripheral processing may simplify stimulus paradigms.

617 For spinal injury patients, the most peripheral site above the lesion is the CN, making it an  
618 appealing option to consider as a site of stimulation for sensory replacement (Loutit & Potas,  
619 2020). We found a somatotopy across each array that was consistent across monkeys. Neurons  
620 were segregated both by modality (rostral and ventral subnuclei) and receptive field location,  
621 similar to earlier descriptions (Loutit et al., 2021). This somatotopic representation may allow for  
622 coherent proprioceptive percepts to be evoked via electrical stimulation. One drawback to CN as  
623 a site of proprioceptive replacement is the potential for damage to the dorsal columns or other  
624 medullary nuclei. While deafferentation is not a major concern for a person with a spinal cord  
625 injury who lacks sensation, CN lies close to medullary regions critical for homeostatic regulation,  
626 such as the dorsal respiratory group (Berger, 1977). Attempts to restore sensation in the medulla  
627 need to take care to minimize trauma to the surrounding tissue, perhaps with lower stiffness or  
628 non-penetrating electrodes.

### 629 **Acknowledgements:**

630 Thanks to Drs. Leah Krubitzer and Mary Baldwin for their histological expertise and helpful  
631 discussions.

632

633

- 634 Andersen, P., Eccles, J. C., Oshima, T., & Schmidt, R. F. (1964). Mechanisms of synaptic  
635 transmission in the Cuneate Nucleus. *Journal of Neurophysiology*, 27(6), 1096–1116.  
636 Retrieved from <http://www.ncbi.nlm.nih.gov/pubmed/14223972>
- 637 Andersen, P., Eccles, J. C., Schmidt, R. F., & Yokota, T. (1964). Identification of relay cells and  
638 interneurons in the Cuneate Nucleus. *Journal of Neurophysiology*, 27(6), 1080–1095.  
639 <https://doi.org/10.1152/jn.1964.27.6.1080>
- 640 Balaram, P., Young, N. A., & Kaas, J. H. (2014). Histological features of layers and sublayers in  
641 cortical visual areas V1 and V2 of chimpanzees, macaque monkeys, and humans. *Eye and*  
642 *Brain*, 6(Suppl 1), 5–18. <https://doi.org/10.2147/EB.S51814>
- 643 Banks, R., & Stacey, M. (1988). Quantitative Studies on Mammalian Muscle Spindles and their  
644 Sensory Innervation. In *Mechanoreceptors* (pp. 263–269). Springer US.  
645 [https://doi.org/10.1007/978-1-4899-0812-4\\_49](https://doi.org/10.1007/978-1-4899-0812-4_49)
- 646 Bengtsson, F., Brasselet, R., Johansson, R. S., Arleo, A., & Jörntell, H. (2013). Integration of  
647 Sensory Quanta in Cuneate Nucleus Neurons In Vivo. *PLoS ONE*, 8(2).  
648 <https://doi.org/10.1371/journal.pone.0056630>
- 649 Bensmaia, S. J., & Miller, L. E. (2014, May). Restoring sensorimotor function through  
650 intracortical interfaces: Progress and looming challenges. *Nature Reviews Neuroscience*.  
651 Nature Publishing Group. <https://doi.org/10.1038/nrn3724>
- 652 Berger, A. J. (1977). Dorsal respiratory group neurons in the medulla of cat: Spinal projections,  
653 responses to lung inflation and superior laryngeal nerve stimulation. *Brain Research*,  
654 135(2), 231–254. [https://doi.org/10.1016/0006-8993\(77\)91028-9](https://doi.org/10.1016/0006-8993(77)91028-9)
- 655 Chan, S. S., & Moran, D. W. (2006). Computational model of a primate arm: from hand position  
656 to joint angles, joint torques and muscle forces. *J. Neural Eng*, 3, 327–337.  
657 <https://doi.org/10.1088/1741-2560/3/4/010>
- 658 Chowdhury, R. H., Glaser, J. I., & Miller, L. E. (2020). Area 2 of primary somatosensory cortex  
659 encodes kinematics of the whole arm. *ELife*, 9. <https://doi.org/10.7554/eLife.48198>
- 660 Cohen, L. G., & Starr, A. (1987). LOCALIZATION, TIMING AND SPECIFICITY OF GATING OF  
661 SOMATOSENSORY EVOKED POTENTIALS DURING ACTIVE MOVEMENT IN MAN  
662 (Vol. 110). Retrieved from [https://academic.oup.com/brain/article-](https://academic.oup.com/brain/article-abstract/110/2/451/467280)  
663 [abstract/110/2/451/467280](https://academic.oup.com/brain/article-abstract/110/2/451/467280)
- 664 Collinger, J. L., Gaunt, R. A., & Schwartz, A. B. (2018). Progress towards restoring upper limb  
665 movement and sensation through intracortical brain-computer interfaces. *Current Opinion*  
666 *in Biomedical Engineering*, 8, 84–92. <https://doi.org/10.1016/J.COBE.2018.11.005>
- 667 Collins, D. F., Refshauge, K. M., Todd, G., & Gandevia, S. C. (2005). Cutaneous receptors  
668 contribute to kinesthesia at the index finger, elbow, and knee. *Journal of Neurophysiology*,  
669 94(3), 1699–1706. <https://doi.org/10.1152/jn.00191.2005>
- 670 Confais, J., Kim, G., Tomatsu, S., Takei, T., & Seki, K. (2017). Nerve-specific input modulation  
671 to spinal neurons during a motor task in the monkey. *Journal of Neuroscience*, 37(10),  
672 2612–2626. <https://doi.org/10.1523/JNEUROSCI.2561-16.2017>
- 673 Delp, S. L., Anderson, F. C., Arnold, A. S., Loan, P., Habib, A., John, C. T., ... Thelen, D. G.  
674 (2007). OpenSim: Open-source software to create and analyze dynamic simulations of  
675 movement. *IEEE Transactions on Biomedical Engineering*, 54(11), 1940–1950.  
676 <https://doi.org/10.1109/TBME.2007.901024>
- 677 Dimitriou, M. (2014). Human muscle spindle sensitivity reflects the balance of activity between

- 678 antagonistic muscles. *The Journal of Neuroscience : The Official Journal of the Society for*  
679 *Neuroscience*, 34(41), 13644–13655. <https://doi.org/10.1523/JNEUROSCI.2611-14.2014>
- 680 Dimitriou, M., & Edin, B. B. (2008). Discharges in human muscle spindle afferents during a key-  
681 pressing task. *Journal of Physiology*, 586(22), 5455–5470.  
682 <https://doi.org/10.1113/jphysiol.2008.160036>
- 683 Edin, B. B. (1992). Quantitative analysis of static strain sensitivity in human mechanoreceptors  
684 from hairy skin. *Journal of Neurophysiology*, 67(5), 1105–1113.  
685 <https://doi.org/10.1152/jn.1992.67.5.1105>
- 686 Edin, B. B., & Johansson, N. (1995). Skin strain patterns provide kinaesthetic information to the  
687 human central nervous system. *The Journal of Physiology*, 487(1), 243–251.  
688 <https://doi.org/10.1113/jphysiol.1995.sp020875>
- 689 Fallon, J. B., & Macefield, V. G. (2007). Vibration sensitivity of human muscle spindles and  
690 Golgi tendon organs. *Muscle & Nerve*, 36(1), 21–29. <https://doi.org/10.1002/mus.20796>
- 691 Flesher, S. N., Collinger, J. L., Foldes, S. T., Weiss, J. M., Downey, J. E., Tyler-Kabara, E. C.,  
692 ... Gaunt, R. A. (2016). Intracortical microstimulation of human somatosensory cortex.  
693 *Science Translational Medicine*, 8(361), 361ra141-361ra141.  
694 <https://doi.org/10.1126/scitranslmed.aaf8083>
- 695 Georgopoulos, A. P., Kalaska, J. F., Caminiti, R., & Massey, J. T. (1982). On the relations  
696 between the direction of two-dimensional arm movements and cell discharge in primate  
697 motor cortex. *The Journal of Neuroscience : The Official Journal of the Society for*  
698 *Neuroscience*, 2(11), 1527–1537. Retrieved from  
699 <http://www.ncbi.nlm.nih.gov/pubmed/7143039>
- 700 Ghez, C., & Pisa, M. (1972). Inhibition of afferent transmission in cuneate nucleus during  
701 voluntary movement in the cat. *Brain Research*, 40(1), 145–155. Retrieved from  
702 <http://www.ncbi.nlm.nih.gov/pubmed/4338259>
- 703 Giesler, G. J., Nahin, R. L., & Madsen, A. M. (1984). Postsynaptic dorsal column pathway of the  
704 rat. I. Anatomical studies. *Journal of Neurophysiology*, 51(2), 260–275.  
705 <https://doi.org/10.1152/jn.1984.51.2.260>
- 706 He, Q., Suresh, A., Versteeg, C., Rosenow, J. M., & Bensmaia, S. J. (2019). Movement gating  
707 of cutaneous signals in the cuneate nucleus. Presented at Society for Neuroscience 2019.
- 708 Hochberg, L. R., Serruya, M. D., Friehs, G. M., Mukand, J. A., Saleh, M., Caplan, A. H., ...  
709 Donoghue, J. P. (2006). Neuronal ensemble control of prosthetic devices by a human with  
710 tetraplegia. *Nature*, 442(7099), 164–171. <https://doi.org/10.1038/nature04970>
- 711 Horch, K., Meek, S., Taylor, T. G., & Hutchinson, D. T. (2011). Object discrimination with an  
712 artificial hand using electrical stimulation of peripheral tactile and proprioceptive pathways  
713 with intrafascicular electrodes. *IEEE Transactions on Neural Systems and Rehabilitation*  
714 *Engineering*, 19(5), 483–489. <https://doi.org/10.1109/TNSRE.2011.2162635>
- 715 Houk, J. C., Rymer, W. Z., & Crago, P. E. (1981). Dependence of dynamic response of spindle  
716 receptors on muscle length and velocity. *Journal of Neurophysiology*, 46(1), 143–166.  
717 <https://doi.org/10.1152/jn.1981.46.1.143>
- 718 Hummelsheim, H., & Wiesendanger, M. (1985). Neuronal responses of medullary relay cells to  
719 controlled stretches of forearm muscles in the monkey. *Neuroscience*, 16(4), 989–996.  
720 [https://doi.org/10.1016/0306-4522\(85\)90111-3](https://doi.org/10.1016/0306-4522(85)90111-3)
- 721 Juravle, G., Binsted, G., & Spence, C. (2017). Tactile suppression in goal-directed movement.

- 722 *Psychonomic Bulletin and Review*, 24(4), 1060–1076. [https://doi.org/10.3758/s13423-016-](https://doi.org/10.3758/s13423-016-1203-6)  
723 1203-6
- 724 Lee, B., Kramer, D., Salas, M. A., Kellis, S., Brown, D., Dobрева, T., ... Andersen, R. A. (2018).  
725 Engineering artificial somatosensation through cortical stimulation in humans. *Frontiers in*  
726 *Systems Neuroscience*, 12. <https://doi.org/10.3389/fnsys.2018.00024>
- 727 Lillicrap, T. P., & Scott, S. H. (2013). Preference Distributions of Primary Motor Cortex Neurons  
728 Reflect Control Solutions Optimized for Limb Biomechanics. *Neuron*, 77(1), 168–179.  
729 <https://doi.org/10.1016/J.NEURON.2012.10.041>
- 730 London, B. M., & Miller, L. E. (2013). Responses of somatosensory area 2 neurons to actively  
731 and passively generated limb movements. *Journal of Neurophysiology*, 109(6), 1505–1513.  
732 <https://doi.org/10.1152/jn.00372.2012>
- 733 Loutit, A. J., & Potas, J. R. (2020). Restoring Somatosensation: Advantages and Current  
734 Limitations of Targeting the Brainstem Dorsal Column Nuclei Complex. *Frontiers in*  
735 *Neuroscience*, 14, 156. <https://doi.org/10.3389/fnins.2020.00156>
- 736 Loutit, A. J., Vickery, R. M., & Potas, J. R. (2021). Functional organization and connectivity of  
737 the dorsal column nuclei complex reveals a sensorimotor integration and distribution hub.  
738 *Journal of Comparative Neurology*, 529(1), 187–220. <https://doi.org/10.1002/cne.24942>
- 739 Mathis, A., Mamidanna, P., Cury, K. M., Abe, T., Murthy, V. N., Mathis, M. W., & Bethge, M.  
740 (2018). DeepLabCut: markerless pose estimation of user-defined body parts with deep  
741 learning. *Nature Neuroscience*, 21(9), 1281–1289. [https://doi.org/10.1038/s41593-018-](https://doi.org/10.1038/s41593-018-0209-y)  
742 0209-y
- 743 Palmeri, A., Bellomo, M., Giuffrida, R., & Sapienza, S. (1999). Motor cortex modulation of  
744 exteroceptive information at bulbar and thalamic lemniscal relays in the cat. *Neuroscience*,  
745 88(1), 135–150. Retrieved from <http://www.ncbi.nlm.nih.gov/pubmed/10051195>
- 746 Proske, U., & Gandevia, S. C. (2012). The Proprioceptive Senses: Their Roles in Signaling  
747 Body Shape, Body Position and Movement, and Muscle Force. *Physiological Reviews*,  
748 92(4), 1651–1697. <https://doi.org/10.1152/physrev.00048.2011>
- 749 Prud'homme, M. J., & Kalaska, J. F. (1994). Proprioceptive activity in primate primary  
750 somatosensory cortex during active arm reaching movements. *Journal of Neurophysiology*,  
751 72(5), 2280–2301. Retrieved from <http://www.ncbi.nlm.nih.gov/pubmed/7884459>
- 752 Rushton, D. N., Rothwell, J. C., & Craggs, M. D. (1981). GATING OF SOMATOSENSORY  
753 EVOKED POTENTIALS DURING DIFFERENT KINDS OF MOVEMENT IN MAN. *Brain*  
754 (Vol. 104). Retrieved from [https://academic.oup.com/brain/article-](https://academic.oup.com/brain/article-abstract/104/3/465/296781)  
755 abstract/104/3/465/296781
- 756 Sainburg, R. L., Ghilardi, M. F., Poizner, H., & Ghez, C. (1995). Control of limb dynamics in  
757 normal subjects and patients without proprioception. *Journal of Neurophysiology*, 73(2),  
758 820–835. <https://doi.org/10.1152/jn.1995.73.2.820>
- 759 Sandbrink, K., Mamidanna, P., Michaelis, C., Mathis, M. W., Bethge, M., & Mathis, A. (2020).  
760 Task-driven hierarchical deep neural network models of the proprioceptive pathway.  
761 <https://doi.org/10.1101/2020.05.06.081372>
- 762 Schiefer, M. A., Graczyk, E. L., Sidik, S. M., Tan, D. W., & Tyler, D. J. (2018). Artificial tactile  
763 and proprioceptive feedback improves performance and confidence on object identification  
764 tasks. *PLOS ONE*, 13(12), e0207659. <https://doi.org/10.1371/journal.pone.0207659>
- 765 Schmidt, R. F., Schady, W. J. L., & Torebjörk, H. E. (1990). Gating of tactile input from the hand



- 766 - I. Effects of finger movement. *Experimental Brain Research*, 79(1), 97–102.  
767 <https://doi.org/10.1007/BF00228877>
- 768 Stevenson, I. H., Cherian, A., London, B. M., Sachs, N. A., Lindberg, E., Reimer, J., ... Kording,  
769 K. P. (2011). Statistical assessment of the stability of neural movement representations.  
770 *Journal of Neurophysiology*, 106(2), 764–774. <https://doi.org/10.1152/jn.00626.2010>
- 771 Suresh, A. K., Winberry, J. E., Versteeg, C., Chowdhury, R., Tomlinson, T., Rosenow, J. M., ...  
772 Bensmaia, S. J. (2017). Methodological considerations for a chronic neural interface with  
773 the cuneate nucleus of macaques. *Journal of Neurophysiology*, 118(6), 3271–3281.  
774 <https://doi.org/10.1152/jn.00436.2017>
- 775 Tabot, G. A., Dammann, J. F., Berg, J. A., Tenore, F. V., Boback, J. L., Vogelstein, R. J., &  
776 Bensmaia, S. J. (2013). Restoring the sense of touch with a prosthetic hand through a  
777 brain interface. *Proceedings of the National Academy of Sciences of the United States of*  
778 *America*, 110(45), 18279–18284. <https://doi.org/10.1073/pnas.1221113110>
- 779 Tan, D. W., Schiefer, M. A., Keith, M. W., Anderson, J. R., Tyler, J., & Tyler, D. J. (2014). A  
780 neural interface provides long-term stable natural touch perception. *Science Translational*  
781 *Medicine*, 6(257). <https://doi.org/10.1126/scitranslmed.3008669>
- 782 Williams, S. R., & Chapman, C. E. (2000). Time course and magnitude of movement-related  
783 gating of tactile detection in humans. II. Effects of stimulus intensity. *Journal of*  
784 *Neurophysiology*, 84(2), 863–875. <https://doi.org/10.1152/jn.2000.84.2.863>
- 785 Williams, S. R., & Chapman, C. E. (2002). Time course and magnitude of movement-related  
786 gating of tactile detection in humans. III. Effect of motor tasks. *Journal of Neurophysiology*,  
787 88(4), 1968–1979. <https://doi.org/10.1152/jn.2002.88.4.1968>
- 788 Williams, S. R., Shenasa, J., & Chapman, C. E. (1998). Time Course and Magnitude of  
789 Movement-Related Gating of Tactile Detection in Humans. I. Importance of Stimulus  
790 Location. *Journal of Neurophysiology*, 79(2), 947–963.  
791 <https://doi.org/10.1152/jn.1998.79.2.947>
- 792 Witham, C. L., & Baker, S. N. (2011). Modulation and transmission of peripheral inputs in  
793 monkey cuneate and external cuneate nuclei. *Journal of Neurophysiology*, 106(5), 2764–  
794 2775. <https://doi.org/10.1152/jn.00449.2011>
- 795

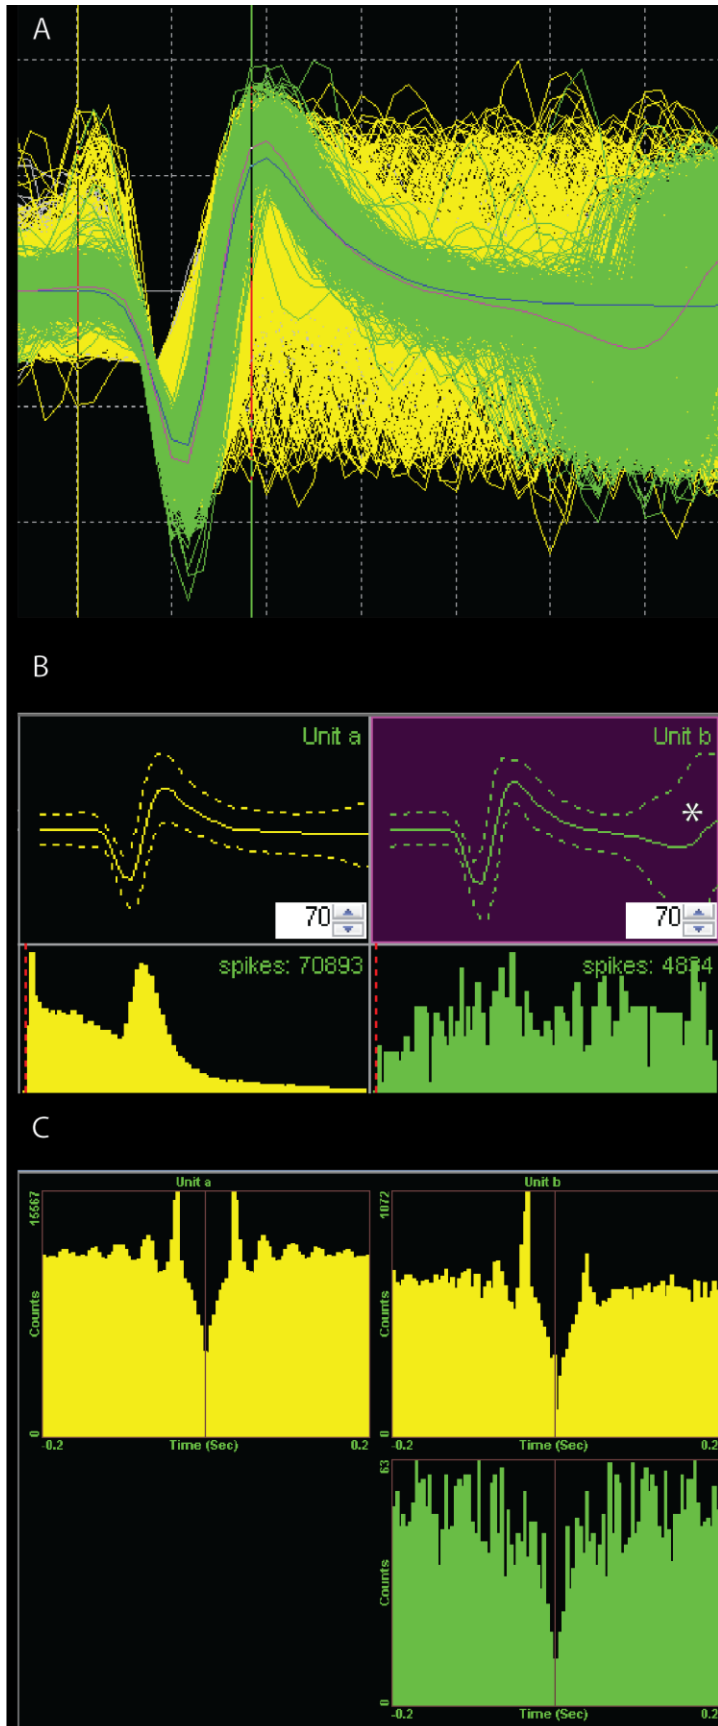

**Sup. Fig 1: Example CN neuron that fires doublet spikes:**

**A:** Waveshape in Offline Sorter of single neuron in CN that fires in two separable modes, either a single spike or two spikes in a single window. Green neuron (sorted separately for visualization) has a large primary spike at the beginning of the 1.6 ms window and a second, temporally precise spike near the end of the same window (green deflections at the right side of the plot). Inter-spike interval (ISI) and cross correlation lags indicate that the yellow neuron is the same neuron without a double spike.

**B:** Waveshapes (top row) and ISI histograms (bottom row) for the sorted waveshapes. Yellow neuron has a strong peak in its ISI, suggesting rhythmicity in its firing. CI at end of green waveshape expands as the second spike occurs, denoted with an asterisk.

**C:** Cross correlogram between the two sorted waveshapes. Upper right quadrant depicts the relative timing between the yellow and green waveshape. Mass to the left of the red line indicates probability that the yellow spike precedes the green spike. This asymmetry was used to find groups of waveshapes that were likely generated by the same neuron.

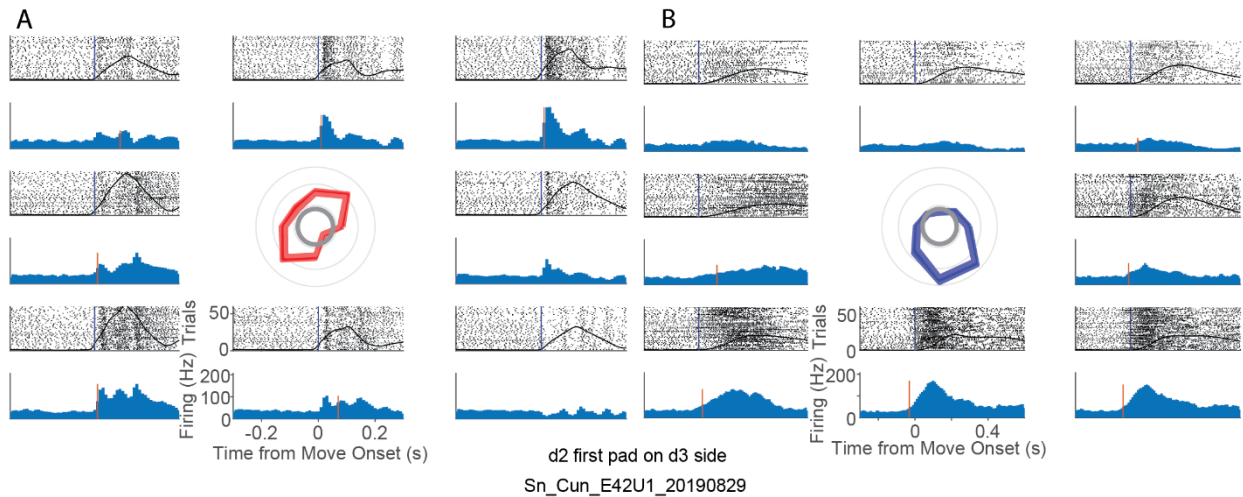

840

841 **Sup. Fig. 2: Example response of CN neuron that receives input from cutaneous**  
842 **receptors on the hand:** A: Passive response of neuron that receives input from the d2 on the  
843 first pad, d3 side. Figure arranged with layout in Fig 5. Bimodal passive tuning curve (shown in  
844 center) was commonly observed for neurons with cutaneous receptive fields on the hand. B:  
845 Response of this neuron during actively generated reaching. We saw strong responses in both  
846 active and passive conditions but were not able to compare neural sensitivity across conditions  
847 due to the inconsistent relationship between hand kinematics and tactile responses.

848

849

| Row               | Combined | Bu<br>(20190329) | Sn<br>(20190829) | Cr<br>(20190418) |
|-------------------|----------|------------------|------------------|------------------|
| Total             | 212      | 106              | 59               | 47               |
| Cuneate           | 126      | 37               | 56               | 33               |
| ActiveTuned       | 109      | 28               | 50               | 31               |
| PassiveTuned      | 76       | 14               | 31               | 31               |
| SinTunedAct       | 111      | 26               | 53               | 32               |
| SinTunedPas       | 67       | 12               | 28               | 27               |
| SinTunedBoth      | 67       | 12               | 28               | 27               |
| Proximal          | 27       | 9                | 6                | 12               |
| Elbow             | 18       | 5                | 6                | 7                |
| Distal            | 15       | 3                | 6                | 6                |
| Hand              | 10       | 2                | 2                | 6                |
| Mapped            | 82       | 24               | 26               | 32               |
| Cutaneous         | 39       | 7                | 16               | 16               |
| Spindle-receiving | 40       | 17               | 9                | 14               |
| Muscle-like       | 42       | 17               | 10               | 15               |

850

851 Sup. Table 1: Movement-related firing rate statistics of CN neurons: Data from one recording  
852 session for each monkey are summarized here, with the date in parenthesis beneath the  
853 monkey. Neurons were included in the “cuneate” class if receptive fields were located on the  
854 arm or torso. Neurons not explicitly mapped on a given session were considered to be in CN if  
855 the electrode on which they were recorded was consistently mapped as CN on days in which it  
856 was tested. “Mapped” indicates how many neurons’ receptive fields were mapped across all a  
857 given monkey’s experimental sessions. “Spindle-receiving” indicates the number responsive to  
858 carefully-placed vibration, indicating a neuron potentially receiving muscle spindle inputs, while  
859 “muscle-like” included both these spindle-receiving and muscle-like neurons that did not  
860 respond to vibration (see further description in methods). “Cutaneous” neurons had an RF that  
861 responded to light touch, as described in the methods. “Proximal”, “elbow”, and “distal” neurons  
862 had receptive fields near the shoulder, elbow and wrist, respectively. Neurons with receptive  
863 fields that spanned a joint were counted for both segments; this was fairly common, minimally a  
864 result of input from a biarticular muscle or large a cutaneous field.



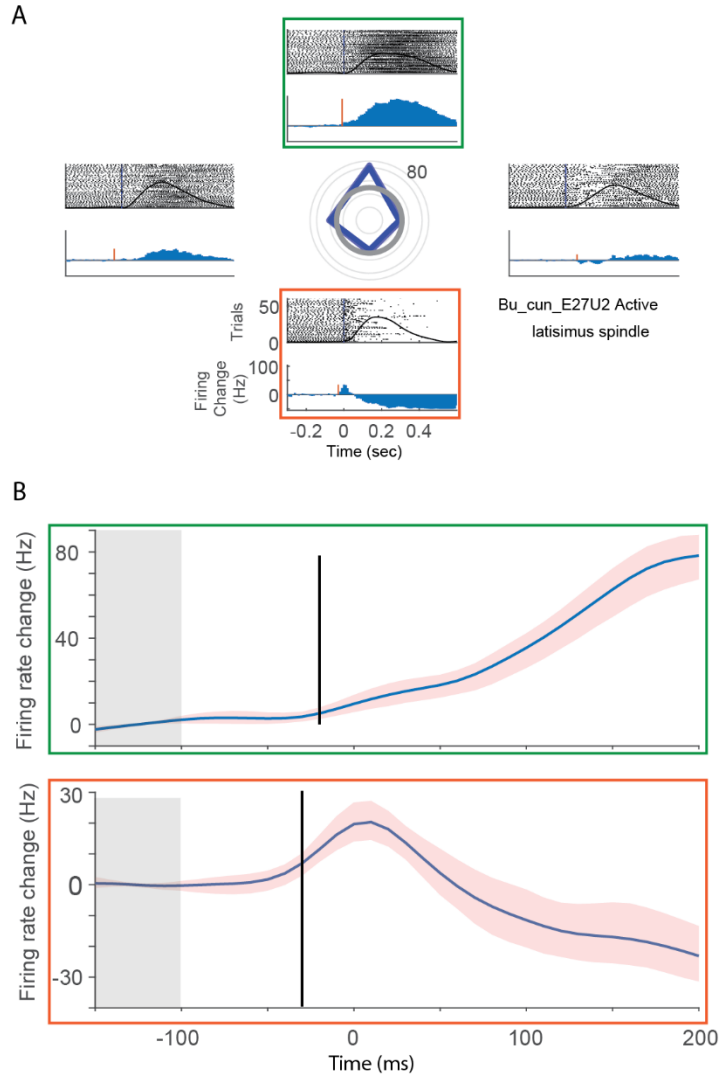

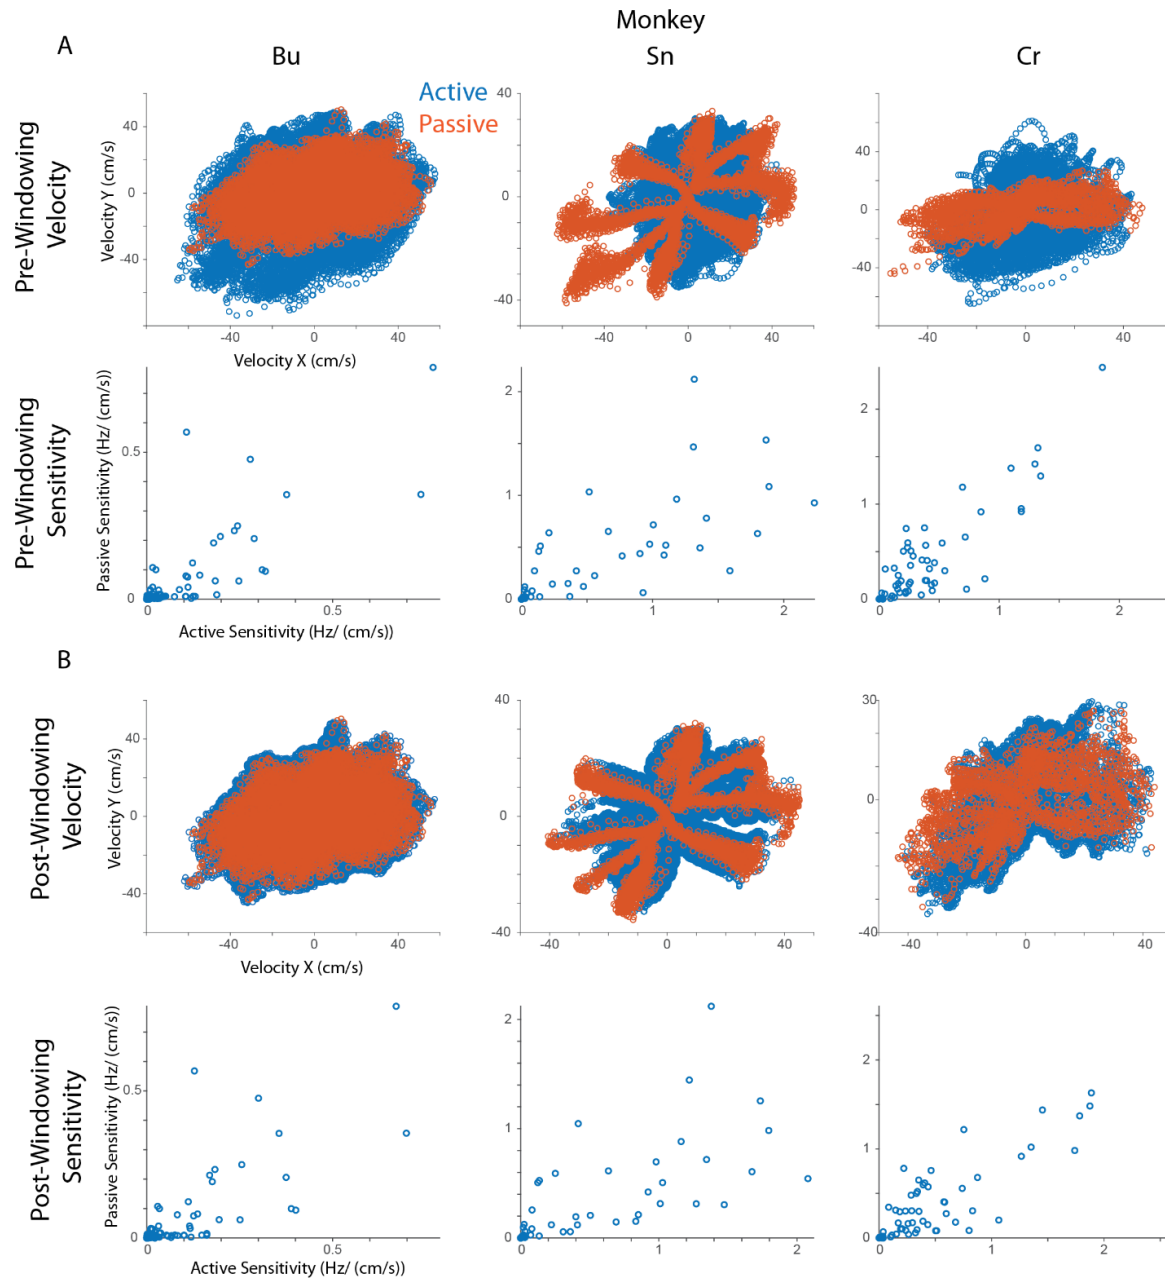

885

886

887 **Sup. Fig. 4: Mismatches in movement kinematics are corrected through a neighborhood**

888 **data windowing technique:** In CN monkeys, kinematics in the active (blue) and passive

889 (orange) conditions differ due to the anisotropy of the arm impedance and musculature. A: First

890 Row - Velocity space in the 400 ms analysis window after movement onset during reach (blue)

891 and the 130 ms window after bump onset (orange). Second row: Sensitivities in the passive

892 condition plotted against the active condition for each monkey. B: Same as top row of A, except

893 nonoverlapping velocity data has been removed. Bottom row: Same as second row after

894 windowing. The computed sensitivities do not change substantially indicating that the models fit

895 to compute sensitivity seem robust to the data windowing process.

896

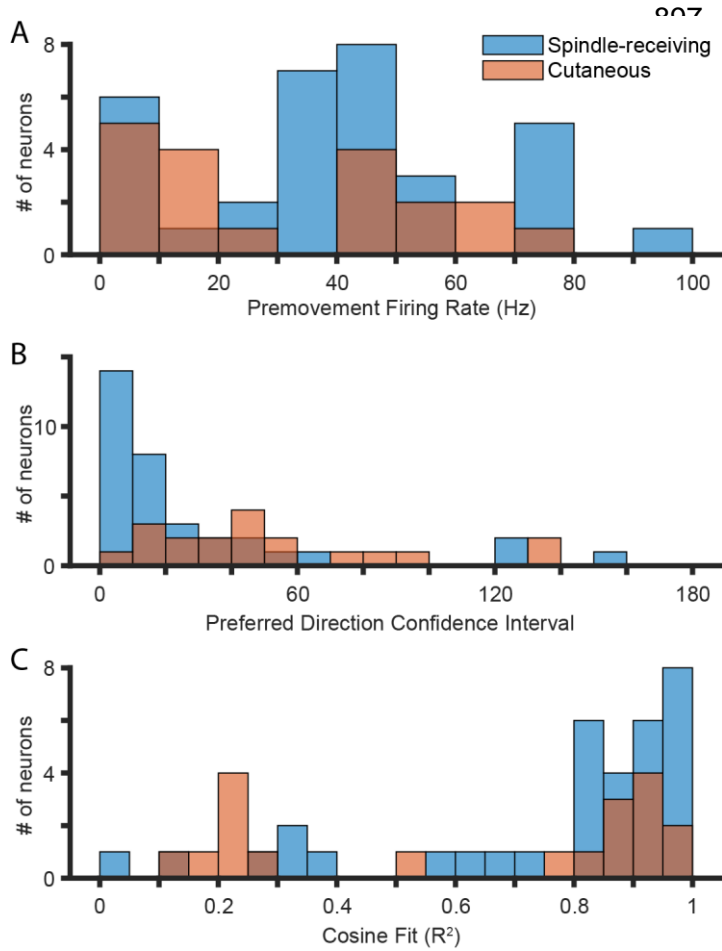

**Sup. Fig. 5: Firing properties of spindle-receiving and cutaneous CN neurons:** Plot includes all CN neurons that do not have RFs on the distal arm. A: Histogram of mean pre-movement firing rates for spindle-receiving CN neurons (blue) and cutaneous neurons (pink). Spindle-receiving neurons often had higher baseline firing rates than cutaneous neurons, there was no statistically significant difference (KS-test,  $p \approx 0.13$ ). B: Histogram of PD confidence interval for spindle and cutaneous CN neurons. Spindle-receiving neurons typically had tighter confidence intervals than cutaneous neurons (KS test,  $p \approx 0.006$ ). C: Sinusoidal goodness-of-fit ( $R^2$  of cosine tuning model) for these neurons. There was no difference between the modality types (KS test,  $p \approx 0.24$ ).

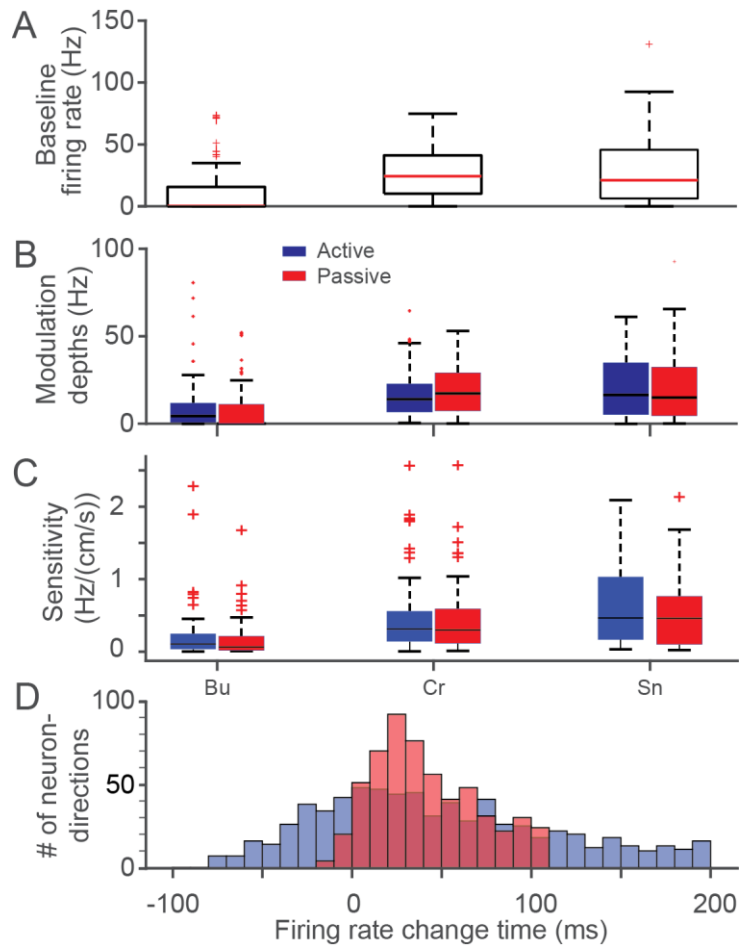

**Sup. Fig. 6: Response statistics of CN neurons during active and passive movements:**

**A:** Box and whisker plot of baseline (100 to 50 ms before movement onset) firing rate of CN neurons from three monkeys (Bu, Cr, Sn). Red line indicates the median, and top and bottom of box indicate the 75% and 25% quantiles respectively. Red crosses indicate outlier neurons.

**B:** Spatial tuning curve depths in active (blue) and passive (red) conditions.

**C:** Sensitivity of CN neurons to hand speed.

**D:** Histogram of response latency relative to movement onset, marginalized across monkeys.



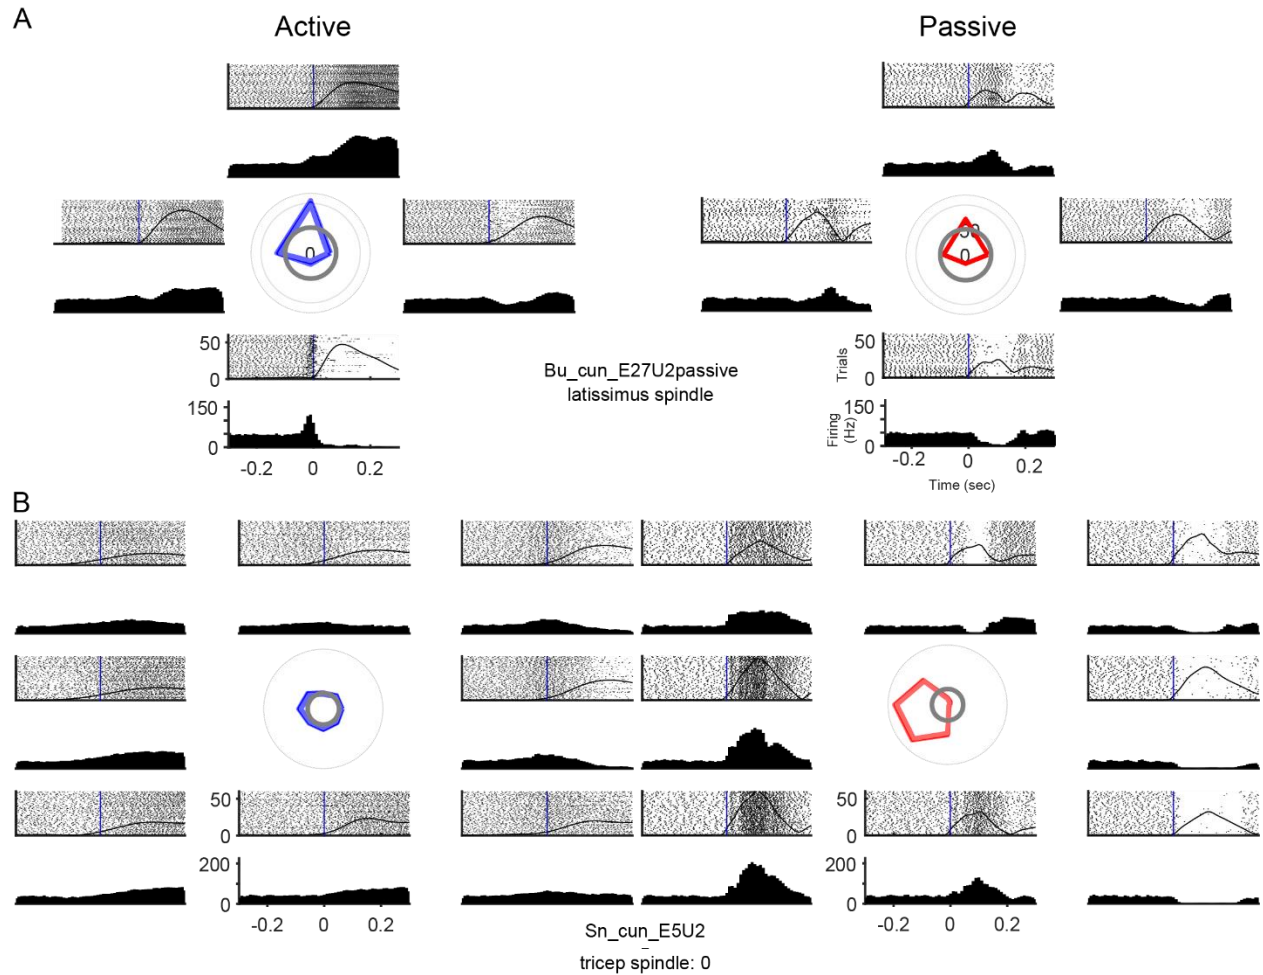

940

941 **Sup. Fig. 7: Example spindle-receiving neurons with pre-movement firing rate increases**  
942 **in the anti-preferred direction:** A: A CN neuron that appeared to receive muscle spindle inputs  
943 from the latissimus. Preferred direction points away from the body in both active (left column,  
944 blue) and passive (right column, red) conditions. Rasters and trial averaged firing rates arranged  
945 radially as in Fig 4. There is a sharp increase in the anti-preferred direction (in this case,  
946 towards the body) in the active condition. B: Same as A, except showing a neuron with inputs  
947 from triceps muscle spindles. The PD points to the left in both conditions, but the firing rate in  
948 the active case increases in the anti-preferred direction (to the right) prior to movement. This  
949 unit is also one of the rare examples in which the active response in a spindle-receiving neuron  
950 was substantially weaker than the passive response.

951

952

953

954

955

956

957

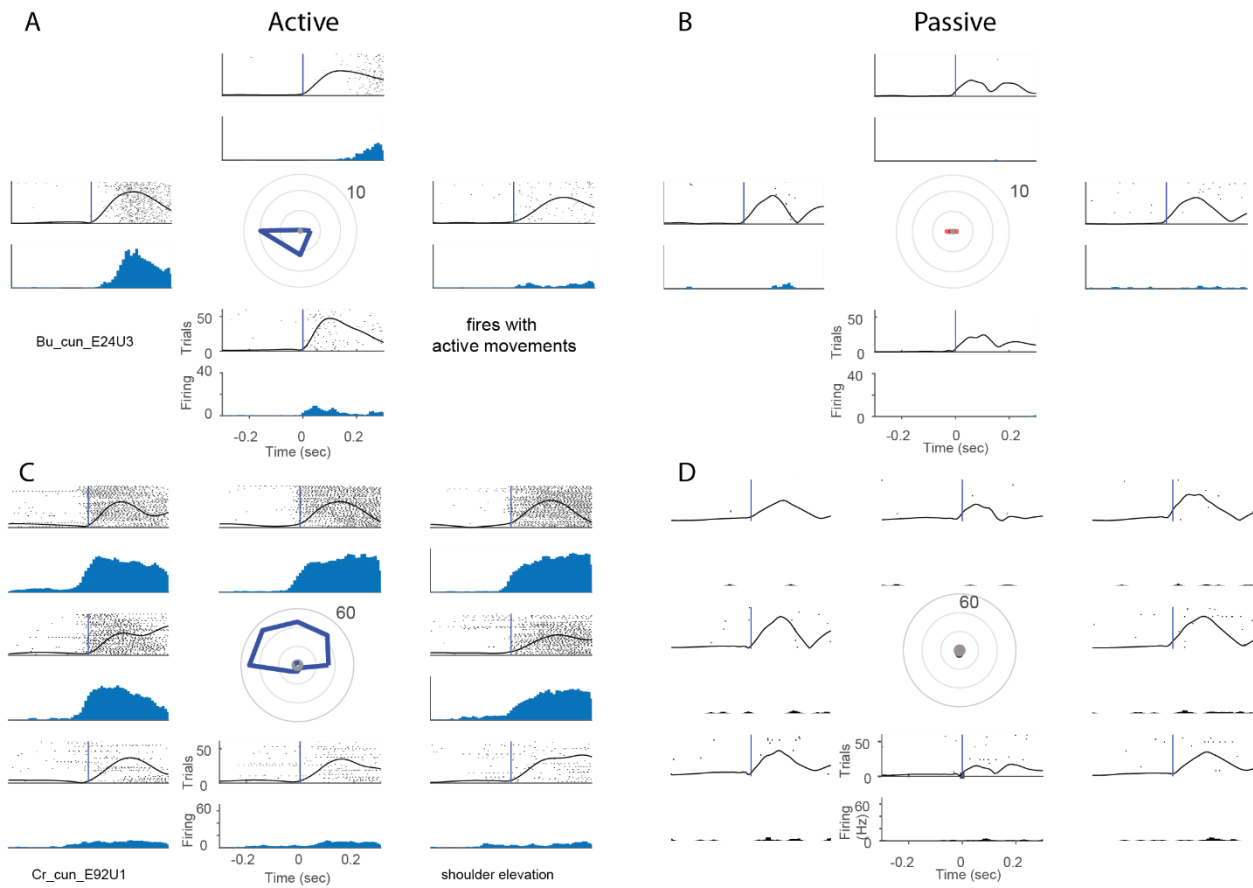

958

959 **Sup. Fig. 8: Example proprioceptive neurons strongly activated in active, but not passive**

960 **conditions:** A: Example neuron that responded when the monkey made active movements,

961 but not during passive displacement. High firing rate occurred in leftwards reaches. B: Same

962 neuron as A was unresponsive during passive perturbation. C: A CN neuron that responded to

963 shoulder elevation and when reaching away from the body. D: This neuron was also

964 unresponsive during passive perturbation.

965

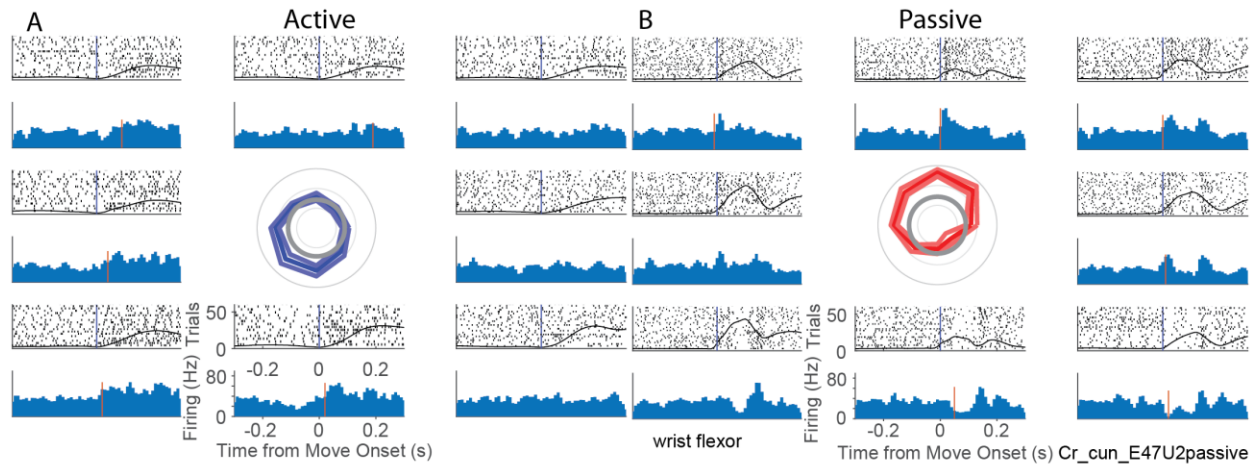

966

967 **Sup. Fig. 9: Example active and passive responses of neuron that appeared to receive**  
968 **inputs from wrist flexor muscle spindles:** A: Responses of a neuron during active reach.  
969 Highest firing rates in the active condition were during reaches toward the body. B: Same  
970 neuron as A. Strongest passive responses are evident at bump onset for bumps away from the  
971 body and in most other directions at ~150 ms after bump onset. The complex differences in  
972 dynamics of the distal arm during reach and perturbation cause the kinematic PDs to point in  
973 different directions.

974

975

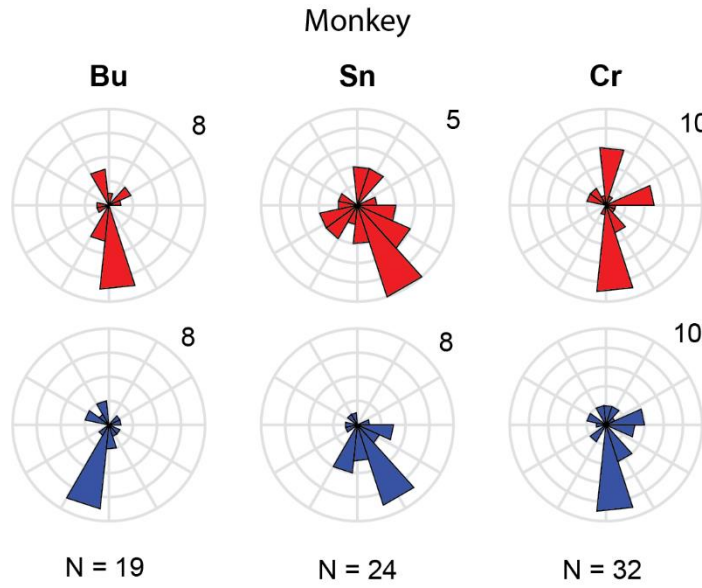

**Sup. Fig. 10: PD distributions for Individual monkeys:** Neurons included in this figure correspond to the combined distributions in Fig 6, and include those that were sinusoidally tuned in both active and passive conditions, from CN regions of the array that appeared to receive inputs from the upper trunk, shoulder or proximal arm. Passive PD distributions (red) are on the top row, active PD distributions (blue) are on the bottom row.

991

992

993

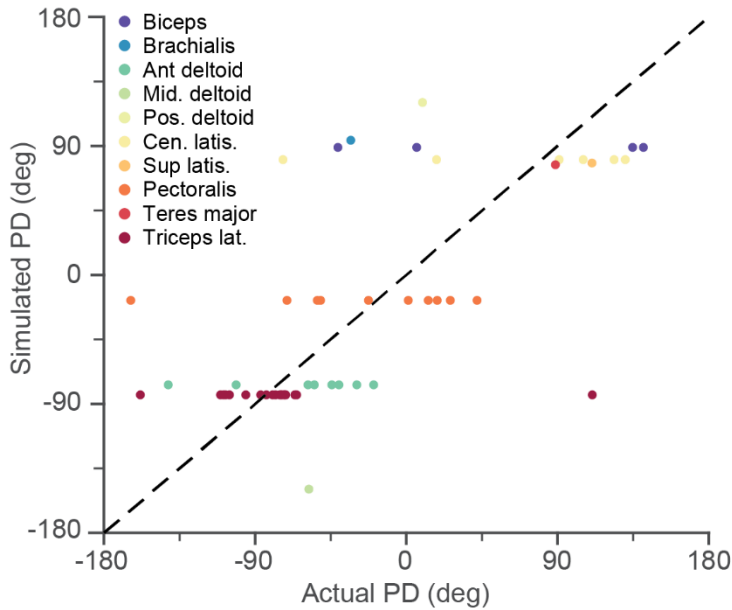

**Sup. Fig. 11: Comparison of actual and simulated PDs:** Scatter plot relating the empirically computed active PD for a given neuron to the expected PD if it received input only from its single dominant apparent spindle input. Each point represents a single neuron, color-coded by its muscle RF.
